# Supplementary material for: Phenotypical screening on metastatic PRCC-TFE3 fusion translocation renal cell carcinoma organoids reveals potential therapeutic agents
Source: Springer Nature journal article supplement (doi:10.1007/s12094-021-02774-8), 2022-02-03

**A****Cancer Drugs Category Distribution**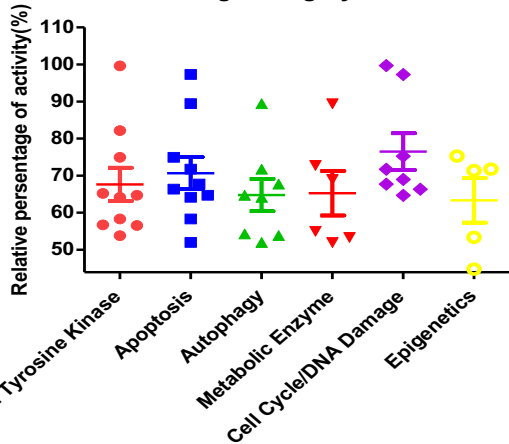**B****Non-oncology Drugs Category Distribution**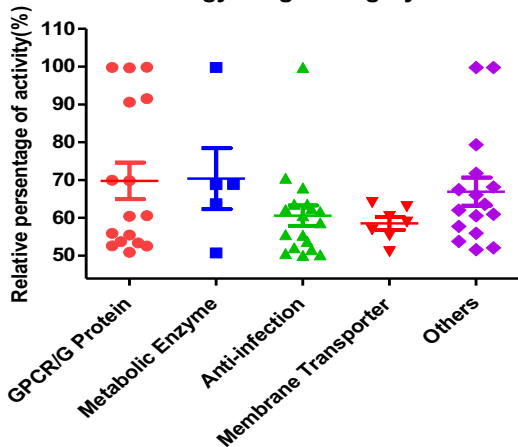

Supplement: MOESM1 [file 20097814]
