# Supplementary material for: Phenotypical screening on metastatic PRCC-TFE3 fusion translocation renal cell carcinoma organoids reveals potential therapeutic agents
Source: Springer Nature journal article supplement (doi:10.1007/s12094-021-02774-8), 2022-02-03
Supplement: MOESM2 [file 20097814]

**Supplementary Data 1. The list of 1816 compounds**

| No | Product Name                                                  | No  | Product Name                              | No   | Product Name                           | No   | Product Name                                 |
|----|---------------------------------------------------------------|-----|-------------------------------------------|------|----------------------------------------|------|----------------------------------------------|
| 1  | (-)-Huperzine A                                               | 501 | Desoximetasone                            | 1001 | Losartan (potassium)                   | 1501 | Selexipag                                    |
| 2  | (-)-Menthol                                                   | 502 | Desvenlafaxine                            | 1002 | Loteprednol Etabonate                  | 1502 | Selumetinib                                  |
| 3  | (-)-Sparteine (sulfate pentahydrate)                          | 503 | Desvenlafaxine (succinate hydrate)        | 1003 | Lovastatin                             | 1503 | Seratrodast                                  |
| 4  | (+)-Ketoconazole                                              | 504 | Detomidine (hydrochloride)                | 1004 | Loxapine                               | 1504 | Sertaconazole (nitrate)                      |
| 5  | (+)- $\alpha$ -Tocopherol                                     | 505 | Dexamethasone                             | 1005 | Loxapine (succinate)                   | 1505 | Sertindole                                   |
| 6  | ( $\pm$ )-Bisoprolol (hemifumarate)                           | 506 | Dexamethasone (acetate)                   | 1006 | Loxoprofen                             | 1506 | Sertraline (hydrochloride)                   |
| 7  | (R)-(-)-Phenylephrine (hydrochloride)                         | 507 | Dexamethasone phosphate disodium          | 1007 | L-SelenoMethionine                     | 1507 | Setipitiline                                 |
| 8  | (R)-Baclofen                                                  | 508 | Dexchlorpheniramine (maleate)             | 1008 | L-Thyroxine                            | 1508 | Setipitiline (maleate)                       |
| 9  | (R)-Lansoprazole                                              | 509 | Dexmedetomidine (hydrochloride)           | 1009 | L-Thyroxine (sodium salt pentahydrate) | 1509 | Sildenafil                                   |
| 10 | (S)-Timolol (Maleate)                                         | 510 | Dexrazoxane hydrochloride                 | 1010 | L-Tryptophan                           | 1510 | Sildenafil (citrate)                         |
| 11 | (Z)-Capsaicin                                                 | 511 | Dextrorotation nimorazole phosphate ester | 1011 | Lubiprostone                           | 1511 | Silibinin                                    |
| 12 | 10-Undecenoic acid                                            | 512 | Dextrose                                  | 1012 | Luliconazole                           | 1512 | Sildenafil                                   |
| 13 | 10-Undecenoic acid (zinc salt)                                | 513 | DHEA                                      | 1013 | Lumacaftor                             | 1513 | Simprevir                                    |
| 14 | 1-Docosanol                                                   | 514 | Diacerein                                 | 1014 | Lumefantrine                           | 1514 | Simvastatin                                  |
| 15 | 20(S)-Ginsenoside Rg3                                         | 515 | Diatrizoic acid                           | 1015 | Lusutrombopag                          | 1515 | Siponimod                                    |
| 16 | 2-Ethoxybenzamide                                             | 516 | Diazoxide                                 | 1016 | Macitentan                             | 1516 | Sisomicin (sulfate)                          |
| 17 | 4-(Aminomethyl)benzoic acid                                   | 517 | Dibucaine                                 | 1017 | Mafenide (Acetate)                     | 1517 | Sitafloxacin (hydrate)                       |
| 18 | 4-Aminopyridine                                               | 518 | Dibucaine (hydrochloride)                 | 1018 | Malathion                              | 1518 | Sitagliptin                                  |
| 19 | 5-Aminolevulinic acid (hydrochloride)                         | 519 | Dichlorisone acetate                      | 1019 | Malotilate                             | 1519 | Sitagliptin (phosphate monohydrate)          |
| 20 | 5-Aminosalicylic Acid                                         | 520 | Dichlorphenamide                          | 1020 | Maltitol                               | 1520 | Sivelestat                                   |
| 21 | 5-Azacytidine                                                 | 521 | Diclofenac                                | 1021 | Mangafodipir (trisodium)               | 1521 | Sivelestat (sodium tetrahydrate)             |
| 22 | 5-Fluorouracil                                                | 522 | Diclofenac (diethylamine)                 | 1022 | Manidipine (dihydrochloride)           | 1522 | sn-Glycero-3-phosphocholine                  |
| 23 | 6-Acetamidohexanoic acid                                      | 523 | Diclofenac (Sodium)                       | 1023 | Maprotiline (hydrochloride)            | 1523 | Sodium 4-aminosalicylate dihydrate           |
| 24 | 6-Aminocaproic acid                                           | 524 | Dicloxacillin (Sodium hydrate)            | 1024 | Maraviroc                              | 1524 | Sodium citrate dihydrate                     |
| 25 | 6-Mercaptopurine hydrate                                      | 525 | Didanosine                                | 1025 | Mebendazole                            | 1525 | Sodium copper chlorophyllin A                |
| 26 | 6-Thioguanine                                                 | 526 | Dienestrol                                | 1026 | Mebhydrolin                            | 1526 | Sodium diatrizoate                           |
| 27 | 6 $\alpha$ -Methylprednisolone 21-hemisuccinate (sodium salt) | 527 | Dienogest                                 | 1027 | Mebhydrolin (napadisylate)             | 1527 | Sodium Fluoride                              |
| 28 | 9-Aminoacridine                                               | 528 | Diethylcarbamazine (citrate)              | 1028 | Meclizine (dihydrochloride)            | 1528 | Sodium gualenate                             |
| 29 | Abacavir                                                      | 529 | Diethylstilbestrol                        | 1029 | Meclofenoxate (hydrochloride)          | 1529 | Sodium phenylbutyrate                        |
| 30 | Abacavir (sulfate)                                            | 530 | Diflorasone                               | 1030 | Medetomidine (hydrochloride)           | 1530 | Sodium Picosulfate                           |
| 31 | Abarelax                                                      | 531 | Diflunisal                                | 1031 | Medroxyprogesterone (acetate)          | 1531 | Sodium Salicylate                            |
| 32 | Abemaciclib (methanesulfonate)                                | 532 | Difluprednate                             | 1032 | Mefenamic acid                         | 1532 | Sodium tauroglycocholate                     |
| 33 | Abiraterone                                                   | 533 | Digitoxin                                 | 1033 | Mefloquine (hydrochloride)             | 1533 | Sofalcone                                    |
| 34 | Abiraterone (acetate)                                         | 534 | Digoxin                                   | 1034 | Megestrol (Acetate)                    | 1534 | Sofosbuvir                                   |
| 35 | Acalabrutinib                                                 | 535 | Dihydroergotamine (mesylate)              | 1035 | Meglumine                              | 1535 | Solifenacin                                  |
| 36 | Acamprosate (calcium)                                         | 536 | Dihydroergotoxine (mesylate)              | 1036 | Melatonin                              | 1536 | Solifenacin (hydrochloride)                  |
| 37 | Acarbose                                                      | 537 | Diiodohydroxyquinoline                    | 1037 | Meloxicam                              | 1537 | Solifenacin (Succinate)                      |
| 38 | Acebutolol (hydrochloride)                                    | 538 | Diloxanide furoate                        | 1038 | Melphalan                              | 1538 | Sorafenib                                    |
| 39 | Accelofenac                                                   | 539 | Diltiazem (hydrochloride)                 | 1039 | Memantine (hydrochloride)              | 1539 | Sorafenib (Tosylate)                         |
| 40 | Acetylglutamide                                               | 540 | Dimemorfan (phosphate)                    | 1040 | Menadione                              | 1540 | Sotalol (hydrochloride)                      |
| 41 | Acemetacin                                                    | 541 | Dimenhydrinate                            | 1041 | Menadione bisulfite (sodium)           | 1541 | Sparfloxacin                                 |
| 42 | Acetazolamide                                                 | 542 | Dimesna                                   | 1042 | Menaquinone-4                          | 1542 | Spectinomycin (dihydrochloride pentahydrate) |
| 43 | Acetohexamide                                                 | 543 | Dimethyl fumarate                         | 1043 | Mephesisin                             | 1543 | Spectinomycin (dihydrochloride)              |
| 44 | Acetohydroxamic acid                                          | 544 | Dimetridazole                             | 1044 | Mepivacaine (hydrochloride)            | 1544 | Spiramycin                                   |
| 45 | Acetylcholine (chloride)                                      | 545 | Dinoprost (tromethamine salt)             | 1045 | Mepyramine maleate                     | 1545 | Spironolactone                               |
| 46 | Acetylcysteine                                                | 546 | Diosmin                                   | 1046 | Mequitazine                            | 1546 | Stavudine                                    |
| 47 | Acetylucine                                                   | 547 | Diphenhydramine (hydrochloride)           | 1047 | Merbromin                              | 1547 | Stibogluconate (sodium)                      |

|    |                                   |     |                                       |      |                                        |      |                            |
|----|-----------------------------------|-----|---------------------------------------|------|----------------------------------------|------|----------------------------|
| 48 | Acetylspiramycin                  | 548 | Diphenidol (hydrochloride)            | 1048 | Meropenem (trihydrate)                 | 1548 | Stripentol                 |
| 49 | Acipimox                          | 549 | Diphenmanil (methylsulfate)           | 1049 | Mesna                                  | 1549 | Streptomycin (sulfate)     |
| 50 | Acitretin                         | 550 | Diphenylpyraline (hydrochloride)      | 1050 | Mestranol                              | 1550 | Succimer                   |
| 51 | Aclacinomycin A hydrochloride     | 551 | Diphylline                            | 1051 | Metaxalone                             | 1551 | Succinylsulthiazole        |
| 52 | Aclidinium (Bromide)              | 552 | Dipyridamole                          | 1052 | Metergoline                            | 1552 | Sucralfate                 |
| 53 | Acrivastine                       | 553 | Diqaofosol (tetrasodium)              | 1053 | Metformin (hydrochloride)              | 1553 | Sucrose                    |
| 54 | Acyclovir                         | 554 | Dirithromycin                         | 1054 | Methacholine (chloride)                | 1554 | Sugammadex (sodium)        |
| 55 | Adapalene                         | 555 | Disulfiram                            | 1055 | Methacycline (hydrochloride)           | 1555 | Sulbactam                  |
| 56 | Adefovir dipivoxil                | 556 | Dithranol                             | 1056 | Methazolamide                          | 1556 | Sulbutiamine               |
| 57 | Ademetionine (disulfate tosylate) | 557 | Dixyrazine                            | 1057 | Methicillin (sodium salt)              | 1557 | Sulconazole (nitrate)      |
| 58 | Adenine                           | 558 | DL-Arginine                           | 1058 | Methimazole                            | 1558 | Sulfabenzamide             |
| 59 | Adenosine                         | 559 | DL-Glutamine                          | 1059 | Methocarbamol                          | 1559 | Sulfacarbamide             |
| 60 | Adiphenine (hydrochloride)        | 560 | D-Mannitol                            | 1060 | Methotrexate                           | 1560 | Sulfacetamide (Sodium)     |
| 61 | Afatinib                          | 561 | Dobutamine (hydrochloride)            | 1061 | Methoxsalen                            | 1561 | Sulfadiazine               |
| 62 | Afatinib (dimaleate)              | 562 | Docetaxel                             | 1062 | Methscopolamine (bromide)              | 1562 | Sulfadoxine                |
| 63 | Afloqualone                       | 563 | Docosahexaenoic Acid                  | 1063 | Methyl Salicylate                      | 1563 | Sulfaguandine              |
| 64 | Agomelatine                       | 564 | Docusate (Sodium)                     | 1064 | Methylbenactyziium Bromide             | 1564 | Sulfalene                  |
| 65 | Agomelatine (hydrochloride)       | 565 | Dofetilide                            | 1065 | Methylcobalamin                        | 1565 | Sulfamerazine              |
| 66 | Ajmaline                          | 566 | Dolasetron                            | 1066 | Methylprednisolone                     | 1566 | Sulfameter                 |
| 67 | Albendazole                       | 567 | Dolasetron (Mesylate hydrate)         | 1067 | Methylprednisolone succinate           | 1567 | Sulfamethazine             |
| 68 | Alcaftadine                       | 568 | Doltegravir                           | 1068 | Methylthiouracil                       | 1568 | Sulfamethizole             |
| 69 | Alectinib                         | 569 | Dolutegravir (sodium)                 | 1069 | Metricrane                             | 1569 | Sulfamethoxazole           |
| 70 | Alectinib (Hydrochloride)         | 570 | Domiphen (bromide)                    | 1070 | Metipranolol hydrochloride             | 1570 | Sulfamonomethoxine         |
| 71 | Alendronate (sodium hydrate)      | 571 | Domperidone                           | 1071 | Metixene hydrochloride hydrate         | 1571 | Sulfanilamide              |
| 72 | Alfuzosin                         | 572 | Donepezil                             | 1072 | Metoclopramide                         | 1572 | Sulfaphenazole             |
| 73 | Alibendol                         | 573 | Donepezil (Hydrochloride)             | 1073 | Metoclopramide (hydrochloride hydrate) | 1573 | Sulfasalazine              |
| 74 | Aliskiren                         | 574 | Doripenem (monohydrate)               | 1074 | Metolazone                             | 1574 | Sulfathiazole (sodium)     |
| 75 | Aliskiren (hemifumarate)          | 575 | Dorzolamide (hydrochloride)           | 1075 | Metoprolol (Succinate)                 | 1575 | Sulfisomidin               |
| 76 | Allantoin                         | 576 | Doxapram (hydrochloride hydrate)      | 1076 | Metronidazole                          | 1576 | Sulfisoxazole              |
| 77 | Allopregnanolone                  | 577 | Doxazosin (mesylate)                  | 1077 | Metyrapone                             | 1577 | Sulfogaiacol               |
| 78 | Allopurinol                       | 578 | Doxepin (Hydrochloride)               | 1078 | Mexiletine (hydrochloride)             | 1578 | Sulindac                   |
| 79 | Almitrine mesylate                | 579 | Doxifluridine                         | 1079 | Mezlocillin (sodium)                   | 1579 | Sulpiride                  |
| 80 | Alogliptin (Benzoate)             | 580 | Doxofylline                           | 1080 | Mianserin (hydrochloride)              | 1580 | Sunitinib                  |
| 81 | Alosetron (Hydrochloride)         | 581 | Doxorubicin (hydrochloride)           | 1081 | Micafungin (sodium)                    | 1581 | Suplatast (Tosilate)       |
| 82 | Alpelisib                         | 582 | Doxycycline (hyclate)                 | 1082 | Miconazole (nitrate)                   | 1582 | Suprofen                   |
| 83 | Alpha-Estradiol                   | 583 | Doxylamine (succinate)                | 1083 | Midecamycin                            | 1583 | Tacrolimus (monohydrate)   |
| 84 | Alprenolol                        | 584 | D-Panthenol                           | 1084 | Midostaurin                            | 1584 | Tadalafil                  |
| 85 | Alprenolol (hydrochloride)        | 585 | D-Pantothenic acid (hemicalcium salt) | 1085 | Mifepristone                           | 1585 | Tafamidis                  |
| 86 | Altretamine                       | 586 | D-Pantothenic acid (sodium)           | 1086 | Miglitol                               | 1586 | Tafamidis meglumine        |
| 87 | Alverine (citrate)                | 587 | Drofenine (hydrochloride)             | 1087 | Miglustat (hydrochloride)              | 1587 | Tafenoquine (Succinate)    |
| 88 | Alvimopan (dihydrate)             | 588 | Dronedarone                           | 1088 | Milnacipran ((1S-cis) hydrochloride)   | 1588 | Tafuprost                  |
| 89 | Alvimopan (monohydrate)           | 589 | Dronedarone (Hydrochloride)           | 1089 | Milnacipran (hydrochloride)            | 1589 | Talazoparib                |
| 90 | Amantadine (hydrochloride)        | 590 | Droperidol                            | 1090 | Milrinone                              | 1590 | Talc                       |
| 91 | Ambrisentan                       | 591 | Dropropizine                          | 1091 | Miltefosine                            | 1591 | Talipexole dihydrochloride |
| 92 | Ambroxol                          | 592 | Drospirenone                          | 1092 | Minaprine (dihydrochloride)            | 1592 | Taltirelin                 |
| 93 | Amezinium (methylsulfate)         | 593 | D-Sorbitol                            | 1093 | Minocycline (hydrochloride)            | 1593 | Tamibarotene               |
| 94 | Amifampridine                     | 594 | Duloxetine (hydrochloride)            | 1094 | Minoxidil                              | 1594 | Tamoxifen                  |
| 95 | Amifostine                        | 595 | Dutasteride                           | 1095 | Mirabegron                             | 1595 | Tamoxifen (Citrate)        |
| 96 | Amikacin (sulfate)                | 596 | Duvelisib                             | 1096 | Miridesap                              | 1596 | Tandospirone               |
| 97 | Amiloride (hydrochloride)         | 597 | Dyclonine (hydrochloride)             | 1097 | Miriplatin                             | 1597 | Tannic acid                |

|     |                                        |     |                                            |      |                                 |      |                                        |
|-----|----------------------------------------|-----|--------------------------------------------|------|---------------------------------|------|----------------------------------------|
| 98  | Amiloride hydrochloride dihydrate      | 598 | Dydrogesterone                             | 1098 | Mirodenafil (dihydrochloride)   | 1598 | Tasimelteon                            |
| 99  | Aminohippurate (sodium)                | 599 | Ebastine                                   | 1099 | Mirtazapine                     | 1599 | Taurine                                |
| 100 | Aminophylline                          | 600 | Econazole (nitrate)                        | 1100 | Misoprostol                     | 1600 | Taurochenodeoxycholic acid             |
| 101 | Amiodarone (hydrochloride)             | 601 | Edaravone                                  | 1101 | Mitiglinide (Calcium)           | 1601 | Taurodeoxycholic Acid (sodium hydrate) |
| 102 | Amisulpride                            | 602 | Edoxaban                                   | 1102 | Mitomycin C                     | 1602 | Taurosodeoxycholate (Sodium)           |
| 103 | Amitriptyline (hydrochloride)          | 603 | Edoxaban (tosylate monohydrate)            | 1103 | Mitotane                        | 1603 | Tavorole                               |
| 104 | Amlexanox                              | 604 | Edrophonium (chloride)                     | 1104 | Mitoxantrone                    | 1604 | Tazarotene                             |
| 105 | Amlodipine                             | 605 | Efavirenz                                  | 1105 | Mitoxantrone (dihydrochloride)  | 1605 | Tazobactam                             |
| 106 | Amlodipine (besylate)                  | 606 | Efinaconazole                              | 1106 | Mizoribine                      | 1606 | Tebipenem pivoxil                      |
| 107 | Amlodipine (maleate)                   | 607 | Eflomithine (hydrochloride, hydrate)       | 1107 | Moclobemide                     | 1607 | Tedizolid                              |
| 108 | Amodiaquin (dihydrochloride dihydrate) | 608 | Efonidipine (hydrochloride monoethanolate) | 1108 | Moexipril (hydrochloride)       | 1608 | Tedizolid (phosphate)                  |
| 109 | Amorolfine (hydrochloride)             | 609 | Eicosapentaenoic Acid                      | 1109 | Molindone (hydrochloride)       | 1609 | Tegafur                                |
| 110 | Amoxapine                              | 610 | Elafibranor                                | 1110 | Molsidomine                     | 1610 | Tegaserod (maleate)                    |
| 111 | Amoxicillin                            | 611 | Elagolix sodium                            | 1111 | Mometasone furoate              | 1611 | Telaprevir                             |
| 112 | Amoxicillin (sodium)                   | 612 | Elbasvir                                   | 1112 | Monensin sodium salt            | 1612 | Telbivudine                            |
| 113 | Amoxicillin (trihydrate)               | 613 | Eletriptan (hydrobromide)                  | 1113 | Monocrotaline                   | 1613 | Telithromycin                          |
| 114 | Amphotericin B                         | 614 | Eliglustat                                 | 1114 | Montelukast (sodium)            | 1614 | Telmisartan                            |
| 115 | Ampicillin (sodium)                    | 615 | Eltrombopag                                | 1115 | Morinidazole                    | 1615 | Telotristat ethyl                      |
| 116 | Ampiroxicam                            | 616 | Eltrombopag (Olamine)                      | 1116 | Morinidazole (R enantiomer)     | 1616 | Telotristat etiprate                   |
| 117 | Amprenavir                             | 617 | Elvitegravir                               | 1117 | Moroxydine (hydrochloride)      | 1617 | Temocapril (hydrochloride)             |
| 118 | Amsacrine                              | 618 | Embelin                                    | 1118 | Mosapride (citrate)             | 1618 | Temoporfin                             |
| 119 | Anagliptin                             | 619 | Emeramide                                  | 1119 | Moxalactam (sodium salt)        | 1619 | Temozolomide                           |
| 120 | Anagrelide (hydrochloride)             | 620 | Emetine (dihydrochloride)                  | 1120 | Moxidectin                      | 1620 | Temsirolimus                           |
| 121 | Anastrozole                            | 621 | Empagliflozin                              | 1121 | Moxisylyte (hydrochloride)      | 1621 | Teneligliptin                          |
| 122 | Anethole (trithione)                   | 622 | Emtricitabine                              | 1122 | Moxonidine                      | 1622 | Teneligliptin (hydrobromide)           |
| 123 | Anidulafungin                          | 623 | Enalapril (maleate)                        | 1123 | Mozavaptan                      | 1623 | Teniposide                             |
| 124 | Aniracetam                             | 624 | Enalaprilat (dihydrate)                    | 1124 | Mupirocin                       | 1624 | Tenofovir                              |
| 125 | Anisindione                            | 625 | Enasidenib                                 | 1125 | Mycophenolate Mofetil           | 1625 | Tenofovir (Disoproxil Fumarate)        |
| 126 | Anisodamine                            | 626 | Enasidenib (mesylate)                      | 1126 | Mycophenolic acid               | 1626 | Tenofovir (Disoproxil)                 |
| 127 | Antazoline (hydrochloride)             | 627 | Enoxacin (hydrate)                         | 1127 | Nabumetone                      | 1627 | Tenofovir (hydrate)                    |
| 128 | Antipyrine                             | 628 | Entacapone                                 | 1128 | Nadifloxacin                    | 1628 | Tenofovir alafenamide                  |
| 129 | Apalutamide                            | 629 | Entecavir (monohydrate)                    | 1129 | Nafamostat (mesylate)           | 1629 | Tenofovir alafenamide fumarate         |
| 130 | Apatinib                               | 630 | Entrectinib                                | 1130 | Naficillin (sodium monohydrate) | 1630 | Tenofovir alafenamide hemifumarate     |
| 131 | Apixaban                               | 631 | Enzalutamide                               | 1131 | Naftidrofuryl (oxalate)         | 1631 | Tenoxicam                              |
| 132 | Apremilast                             | 632 | Epalrestat                                 | 1132 | Naftifine (hydrochloride)       | 1632 | Teprenone                              |
| 133 | Aprepitant                             | 633 | Eperisone (Hydrochloride)                  | 1133 | Naftopidil                      | 1633 | Terazosin (hydrochloride dihydrate)    |
| 134 | Apronal                                | 634 | Epinastine                                 | 1134 | Nalfurafine (hydrochloride)     | 1634 | Terbinafine                            |
| 135 | Aprotinin                              | 635 | Epirubicin (hydrochloride)                 | 1135 | Nalidixic acid                  | 1635 | Terbinafine hydrochloride              |
| 136 | Argatroban (monohydrate)               | 636 | Eplerenone                                 | 1136 | Naloxegol (oxalate)             | 1636 | Terbutaline (sulfate)                  |
| 137 | Argipressin                            | 637 | Eprosartan (mesylate)                      | 1137 | Naphazoline (hydrochloride)     | 1637 | Terconazole                            |
| 138 | Aripiprazole                           | 638 | Eptifibatide                               | 1138 | Naproxen                        | 1638 | Teriflunomide                          |
| 139 | Artemether                             | 639 | Eravacycline (dihydrochloride)             | 1139 | Naproxen (sodium)               | 1639 | Teriparatide                           |
| 140 | Artemisinin                            | 640 | Erdaftinib                                 | 1140 | Naratriptan (hydrochloride)     | 1640 | Terlipressin                           |
| 141 | Artemotil                              | 641 | Erdosteine                                 | 1141 | Natamycin                       | 1641 | Terpin (hydrate)                       |
| 142 | Arterolane                             | 642 | Erismodegib                                | 1142 | Nateglinide                     | 1642 | Tetrabenazine                          |
| 143 | Artesunate                             | 643 | Erismodegib diphosphate                    | 1143 | Nebivolol (hydrochloride)       | 1643 | Tetracaine                             |
| 144 | Articaine (hydrochloride)              | 644 | Erlotinib                                  | 1144 | Nedaplatin                      | 1644 | Tetracycline (hydrochloride)           |
| 145 | Asenapine                              | 645 | Erlotinib (Hydrochloride)                  | 1145 | Nedocromil                      | 1645 | Tetrahydrobiopterin                    |
| 146 | Asenapine (hydrochloride)              | 646 | Ertapenem sodium                           | 1146 | Nefazodone (hydrochloride)      | 1646 | Tetrahydrozoline (hydrochloride)       |
| 147 | Asenapine (maleate)                    | 647 | Ertugliflozin                              | 1147 | Nefopam (hydrochloride)         | 1647 | Tetramisole (hydrochloride)            |

|     |                                       |     |                                    |      |                                           |      |                                       |
|-----|---------------------------------------|-----|------------------------------------|------|-------------------------------------------|------|---------------------------------------|
| 148 | Aspirin                               | 648 | Ertugliflozin L-pyroglyutamic acid | 1148 | Nelarabine                                | 1648 | Tezacaftor                            |
| 149 | Asunaprevir                           | 649 | Erythromycin                       | 1149 | Nelfinavir                                | 1649 | Thalidomide                           |
| 150 | Ataluren                              | 650 | Erythromycin Ethylsuccinate        | 1150 | Nelfinavir (Mesylate)                     | 1650 | Theophylline                          |
| 151 | Atazanavir (sulfate)                  | 651 | Esaxerenone                        | 1151 | Neomycin (sulfate)                        | 1651 | Thiabendazole                         |
| 152 | Atenolol                              | 652 | Escin                              | 1152 | Neostigmine (Bromide)                     | 1652 | Thiamine hydrochloride                |
| 153 | Atomoxetine (hydrochloride)           | 653 | Escitalopram (oxalate)             | 1153 | Neostigmine (methyl sulfate)              | 1653 | Thiamine monochloride                 |
| 154 | Atorvastatin (hemicalcium salt)       | 654 | Eslicarbazepine (acetate)          | 1154 | Nepafenac                                 | 1654 | Thiamine nitrate                      |
| 155 | Atovaquone                            | 655 | Esmolol (hydrochloride)            | 1155 | Neratinib                                 | 1655 | Thiamphenicol                         |
| 156 | Atracurium (besylate)                 | 656 | Esomeprazole magnesium             | 1156 | Netilmicin (sulfate)                      | 1656 | Thioridazine (hydrochloride)          |
| 157 | Atrasentan (hydrochloride)            | 657 | Estradiol                          | 1157 | Netupitant                                | 1657 | Thio-TEPA                             |
| 158 | Atropine                              | 658 | Estradiol (benzoate)               | 1158 | Nevirapine                                | 1658 | Thonzonium (bromide)                  |
| 159 | Atropine (sulfate monohydrate)        | 659 | Estradiol (cypionate)              | 1159 | Niacin                                    | 1659 | Tiagabine (hydrochloride)             |
| 160 | Atropine methyl bromide               | 660 | Estramustine (phosphate sodium)    | 1160 | Nicardipine (Hydrochloride)               | 1660 | Tiamulin (fumarate)                   |
| 161 | Auranofin                             | 661 | Estriol                            | 1161 | Nicergoline                               | 1661 | Ticagrelor                            |
| 162 | Avanafil                              | 662 | Estrone                            | 1162 | Niclosamide                               | 1662 | Ticarcillin (disodium)                |
| 163 | Avibactam (sodium hydrate)            | 663 | Estropipate                        | 1163 | Nicorandil                                | 1663 | Ticlopidine (hydrochloride)           |
| 164 | Avibactam (sodium)                    | 664 | Etamivan                           | 1164 | Nicotinamide                              | 1664 | Tigecycline                           |
| 165 | Avobenzene                            | 665 | Ethacridine (lactate monohydrate)  | 1165 | Nifedipine                                | 1665 | Tigecycline (tetramesylate)           |
| 166 | Axitinib                              | 666 | Ethacridine (lactate)              | 1166 | Niflumic acid                             | 1666 | Tilorone (dihydrochloride)            |
| 167 | Azaperone                             | 667 | Ethambutol (dihydrochloride)       | 1167 | Nifuratel                                 | 1667 | Tinidazole                            |
| 168 | Azaphen (dihydrochloride monohydrate) | 668 | Ethamsylate                        | 1168 | Nifuroxazide                              | 1668 | Tinoridine hydrochloride              |
| 169 | Azasetron (hydrochloride)             | 669 | Ethionamide                        | 1169 | Nifurtimox                                | 1669 | Tioconazole                           |
| 170 | Azatadine (dimaleate)                 | 670 | Ethosuximide                       | 1170 | Nikethamide                               | 1670 | Tiopronin                             |
| 171 | Azathioprine                          | 671 | Ethoxzolamide                      | 1171 | Nilotinib                                 | 1671 | Tiotropium (Bromide)                  |
| 172 | AZD7545                               | 672 | Ethynodiol (diacetate)             | 1172 | Nilotinib (monohydrochloride monohydrate) | 1672 | Tipiracil (hydrochloride)             |
| 173 | Azelaic acid                          | 673 | Ethynyl Estradiol                  | 1173 | Nilvadipine                               | 1673 | Tipranavir                            |
| 174 | Azelastine (hydrochloride)            | 674 | Etidronic acid                     | 1174 | Nimesulide                                | 1674 | Tiratricol                            |
| 175 | Azelmidipine                          | 675 | Etodolac                           | 1175 | Nimodipine                                | 1675 | Tirofiban (hydrochloride monohydrate) |
| 176 | Azilsartan                            | 676 | Etofenamate                        | 1176 | Nimorazole                                | 1676 | Tizanidine (hydrochloride)            |
| 177 | Azilsartan (medoxomil)                | 677 | Etofylline                         | 1177 | Nintedanib                                | 1677 | Tobramycin                            |
| 178 | Azithromycin                          | 678 | Etomidate                          | 1178 | Nintedanib esylate                        | 1678 | Toceranib                             |
| 179 | Azlocillin (sodium salt)              | 679 | Etomidate (hydrochloride)          | 1179 | Niraparib                                 | 1679 | Tocofersolan                          |
| 180 | Aztreonam                             | 680 | Etoposide                          | 1180 | Niraparib hydrochloride                   | 1680 | Tofacitinib                           |
| 181 | Bacampicillin (hydrochloride)         | 681 | Etoricoxib                         | 1181 | Niraparib tosylate                        | 1681 | Tofacitinib (citrate)                 |
| 182 | Balofloxacin                          | 682 | Etravirine                         | 1182 | Nitazoxanide                              | 1682 | Tofogliflozin (hydrate)               |
| 183 | Baloxavir marboxil                    | 683 | Etretinate                         | 1183 | Nitisinone                                | 1683 | Tolazamide                            |
| 184 | Balsalazide                           | 684 | Etripamil                          | 1184 | Nitrendipine                              | 1684 | Tolazoline (hydrochloride)            |
| 185 | Bambuterol hydrochloride              | 685 | Evans Blue                         | 1185 | Nitrofurantoin                            | 1685 | Tolbutamide                           |
| 186 | Baricitinib                           | 686 | Exemestane                         | 1186 | Nitrofurazone                             | 1686 | Tolcapone                             |
| 187 | Baricitinib (phosphate)               | 687 | Ezetimibe                          | 1187 | Nitroprusside (disodium dihydrate)        | 1687 | Tolfenamic Acid                       |
| 188 | Bazedoxifene (acetate)                | 688 | Fabomotizole (hydrochloride)       | 1188 | Nitroxoline                               | 1688 | Tolmetin (sodium dihydrate)           |
| 189 | Bedaquiline                           | 689 | Fadrozole                          | 1189 | Nizatidine                                | 1689 | Toloxatone                            |
| 190 | Bedaquiline (fumarate)                | 690 | Famciclovir                        | 1190 | Nonivamide                                | 1690 | Tolperisone (hydrochloride)           |
| 191 | Bekanamycin                           | 691 | Famotidine                         | 1191 | Norepinephrine                            | 1691 | Tolterodine                           |
| 192 | Belinostat                            | 692 | Faropenem daloxate                 | 1192 | Norepinephrine (bitartrate monohydrate)   | 1692 | Tolterodine (tartrate)                |
| 193 | Belotecan (hydrochloride)             | 693 | Faropenem sodium                   | 1193 | Norethindrone acetate                     | 1693 | Tolvaptan                             |
| 194 | Bemegride                             | 694 | Fasudil (Hydrochloride)            | 1194 | Norfloracin                               | 1694 | Topiramate                            |
| 195 | Benactyzine hydrochloride             | 695 | Favipiravir                        | 1195 | Nortriptyline (hydrochloride)             | 1695 | Topiroxostat                          |
| 196 | Benazepril (hydrochloride)            | 696 | Febuxostat                         | 1196 | Norvancomycin (hydrochloride)             | 1696 | Topotecan (Hydrochloride)             |
| 197 | Bendamustine (hydrochloride)          | 697 | Felbamate                          | 1197 | Noscapine                                 | 1697 | Toremifene (Citrate)                  |

|     |                                                           |     |                                      |      |                                |      |                                   |
|-----|-----------------------------------------------------------|-----|--------------------------------------|------|--------------------------------|------|-----------------------------------|
| 198 | Bendazol                                                  | 698 | Felbinac                             | 1198 | Novobiocin (Sodium)            | 1698 | Torseמיד                          |
| 199 | Benfluorex hydrochloride                                  | 699 | Felodipine                           | 1199 | Nystatin                       | 1699 | Tosufloxacin (tosylate hydrate)   |
| 200 | Benfotiamine                                              | 700 | Felypressin                          | 1200 | Obeticholic acid               | 1700 | Trametinib                        |
| 201 | Benidipine (hydrochloride)                                | 701 | Fenbufen                             | 1201 | Oceniđine (dihydrochloride)    | 1701 | Trametinib (DMSO solvate)         |
| 202 | Benorilate                                                | 702 | Fenofibrate                          | 1202 | Octinoxate                     | 1702 | Trandolapril                      |
| 203 | Benserazide hydrochloride (Synonyms: Serazide; Ro 4-4602) | 703 | Fenofibric acid                      | 1203 | Octoerylene                    | 1703 | Tranexamic acid                   |
| 204 | Bentiromide                                               | 704 | Fenoldopam (mesylate)                | 1204 | Octreotide (acetate)           | 1704 | Tranilast                         |
| 205 | Benzamil hydrochloride                                    | 705 | Fenopropfen (Calcium hydrate)        | 1205 | Ofloxacin                      | 1705 | Tranylcypromine (hemisulfate)     |
| 206 | Benzbromarone                                             | 706 | Fenspiride (Hydrochloride)           | 1206 | Olanzapine                     | 1706 | Trapidil                          |
| 207 | Benznidazol                                               | 707 | Fenticonazole (Nitrate)              | 1207 | Olaparib                       | 1707 | Travoprost                        |
| 208 | Benzocaine                                                | 708 | Fertirelin                           | 1208 | Olmesartan                     | 1708 | Trazodone (hydrochloride)         |
| 209 | Benzthiazide                                              | 709 | Fesoterodine (fumarate)              | 1209 | Olmesartan (medoxomil)         | 1709 | Trelagliptin                      |
| 210 | Benztropine (mesylate)                                    | 710 | Fexofenadine (hydrochloride)         | 1210 | Olopatadine (hydrochloride)    | 1710 | Trelagliptin (succinate)          |
| 211 | Benzydamine (hydrochloride)                               | 711 | Fidaxomicin                          | 1211 | Olprinone (Hydrochloride)      | 1711 | Treosulfan                        |
| 212 | Benzyl alcohol                                            | 712 | Fimasartan                           | 1212 | Olsalazine (Disodium)          | 1712 | Treprostinil (sodium)             |
| 213 | Benzyl benzoate                                           | 713 | Finafloxacin                         | 1213 | Omarigliptin                   | 1713 | Triamcinolone                     |
| 214 | Bephenium (hydroxynaphthoate)                             | 714 | Finasteride                          | 1214 | Ombitasvir                     | 1714 | Triamcinolone (acetone)           |
| 215 | Bepotastine (Besilate)                                    | 715 | Fingolimod                           | 1215 | Omeprazole                     | 1715 | Triamcinolone hexacetone          |
| 216 | Bepridil hydrochloride                                    | 716 | Fingolimod (hydrochloride)           | 1216 | Opicapone                      | 1716 | Triamterene                       |
| 217 | Berberine (chloride hydrate)                              | 717 | Firocoxib                            | 1217 | Orlistat                       | 1717 | Tricaprilin                       |
| 218 | Berberine (chloride)                                      | 718 | Flavin Adenine Dinucleotide Disodium | 1218 | Ornidazole                     | 1718 | Trichlormethiazide                |
| 219 | Besifloxacin (Hydrochloride)                              | 719 | Flavoxate (hydrochloride)            | 1219 | Ornidazole (Levo-)             | 1719 | Triclabendazole                   |
| 220 | Bestatin                                                  | 720 | Flecainide (acetate)                 | 1220 | Ompressin                      | 1720 | Triclosan                         |
| 221 | Betahistine (dihydrochloride)                             | 721 | Flibanserin                          | 1221 | Orotic acid                    | 1721 | Trifluoperazine (dihydrochloride) |
| 222 | Betaine (hydrochloride)                                   | 722 | Floxuridine                          | 1222 | Orphenadrine (citrate)         | 1722 | Triflupromazine (hydrochloride)   |
| 223 | Betamethasone                                             | 723 | Flubendazole                         | 1223 | Osalmid                        | 1723 | Trifluridine                      |
| 224 | Betamethasone dipropionate                                | 724 | Flucloxacillin sodium                | 1224 | Oseltamivir (acid)             | 1724 | Triflusal                         |
| 225 | Betamipron                                                | 725 | Fluconazole                          | 1225 | Oseltamivir (phosphate)        | 1725 | Trihexyphenidyl (hydrochloride)   |
| 226 | Betaxolol                                                 | 726 | Flucytosine                          | 1226 | Osimertinib                    | 1726 | Trilostane                        |
| 227 | Betaxolol (hydrochloride)                                 | 727 | Fludarabine                          | 1227 | Osimertinib mesylate           | 1727 | Trimebutine (maleate)             |
| 228 | Bethanechol (chloride)                                    | 728 | Fludarabine (phosphate)              | 1228 | Ospemifene                     | 1728 | Trimetazidine (dihydrochloride)   |
| 229 | Betrixaban                                                | 729 | Fludrocortisone (acetate)            | 1229 | Otilonium (bromide)            | 1729 | Trimethadione                     |
| 230 | Bexarotene                                                | 730 | Flufenamic acid                      | 1230 | Ouabain (Octahydrate)          | 1730 | Trimethobenzamide hydrochloride   |
| 231 | Bezafibrate                                               | 731 | Flumazenil                           | 1231 | Oxaceprol                      | 1731 | Trimethoprim                      |
| 232 | Biapenem                                                  | 732 | Flumethasone                         | 1232 | Oxacillin (sodium monohydrate) | 1732 | Trimipramine (maleate)            |
| 233 | Bicalutamide                                              | 733 | Flunarizine (dihydrochloride)        | 1233 | Oxaliplatin                    | 1733 | Tripelennamine (hydrochloride)    |
| 234 | Bictegravir                                               | 734 | Flunisolide                          | 1234 | Oxantel (pamoate)              | 1734 | Troglitazone                      |
| 235 | Bicyclol                                                  | 735 | Fluocinolone (Acetonide)             | 1235 | Oxapropin                      | 1735 | Tropicamide                       |
| 236 | Bifonazole                                                | 736 | Fluocinonide                         | 1236 | Oxcarbazepine                  | 1736 | Tropisetron                       |
| 237 | Bilastine                                                 | 737 | Fluorescein                          | 1237 | Oxeladin (citrate)             | 1737 | Tropisetron (Hydrochloride)       |
| 238 | Bimatoprost                                               | 738 | Fluoxetine (hydrochloride)           | 1238 | Oxethazaine                    | 1738 | Trospium (chloride)               |
| 239 | Binimetinib                                               | 739 | Fluphenazine (dihydrochloride)       | 1239 | Oxiconazole nitrate            | 1739 | Troxipide                         |
| 240 | Biotin                                                    | 740 | Flupirtine (Maleate)                 | 1240 | Oxiracetam                     | 1740 | Tucidinostat                      |
| 241 | Biperiden (Hydrochloride)                                 | 741 | Fluralaner                           | 1241 | Oxolamine (citrate)            | 1741 | Tulobuterol (hydrochloride)       |
| 242 | Bisacodyl                                                 | 742 | Flurbiprofen                         | 1242 | Oxybenzone                     | 1742 | Udenafil                          |
| 243 | Bisotrizole                                               | 743 | Flutamide                            | 1243 | Oxybutynin                     | 1743 | Ulipristal (acetate)              |
| 244 | Bivalirudin (TFA)                                         | 744 | Fluticasone (propionate)             | 1244 | Oxybutynin (chloride)          | 1744 | Umeclidinium (bromide)            |
| 245 | Bleomycin (sulfate)                                       | 745 | Fluvastatin (sodium)                 | 1245 | Oxyclozanide                   | 1745 | Upadacitinib                      |
| 246 | Blonanserin                                               | 746 | Fluvoxamine (maleate)                | 1246 | Oxytetracycline                | 1746 | Urapidil                          |
| 247 | Boceprevir                                                | 747 | Folic acid                           | 1247 | Oxytocin (acetate)             | 1747 | Urea                              |

|     |                                  |     |                                |      |                                         |      |                                |
|-----|----------------------------------|-----|--------------------------------|------|-----------------------------------------|------|--------------------------------|
| 248 | Bortezomib                       | 748 | Fomepizole                     | 1248 | Ozagrel                                 | 1748 | Uridin                         |
| 249 | Bosentan                         | 749 | Fondaparinux (sodium)          | 1249 | Ozagrel sodium                          | 1749 | Ursodiol                       |
| 250 | Bosentan (hydrate)               | 750 | Forodesine (hydrochloride)     | 1250 | Ozenoxacin                              | 1750 | Vadadustat                     |
| 251 | Bosutinib                        | 751 | Fosamprenavir                  | 1251 | Paclitaxel                              | 1751 | VAL-083                        |
| 252 | Bremelanotide (Acetate)          | 752 | Fosfluconazole                 | 1252 | Palbociclib (hydrochloride)             | 1752 | Valacyclovir (hydrochloride)   |
| 253 | Brexpiprazole                    | 753 | Fosfomycin (calcium)           | 1253 | Palbociclib (isethionate)               | 1753 | Valbenazine                    |
| 254 | Brimonidine                      | 754 | Fosinopril (sodium)            | 1254 | Paliperidone                            | 1754 | Valdecoxib                     |
| 255 | Brimonidine (tartrate)           | 755 | Fosphenytoin (disodium)        | 1255 | Palonosetron (Hydrochloride)            | 1755 | Valganciclovir (hydrochloride) |
| 256 | Brinzolamide                     | 756 | Fostamatinib Disodium          | 1256 | Pamidronate (disodium pentahydrate)     | 1756 | Valnemulin (Hydrochloride)     |
| 257 | Brivudine                        | 757 | Framycetin                     | 1257 | Pamidronic acid                         | 1757 | Valproic acid                  |
| 258 | Bromfenac (sodium hydrate)       | 758 | Fructose                       | 1258 | Pancuronium (dibromide)                 | 1758 | Valproic acid (sodium salt)    |
| 259 | Bromhexine (hydrochloride)       | 759 | Fudosteine                     | 1259 | Panobinostat                            | 1759 | Valpromide                     |
| 260 | Bromisoval                       | 760 | Fulvestrant                    | 1260 | Pantoprazole (sodium)                   | 1760 | Valrubicin                     |
| 261 | Bromocriptine (mesylate)         | 761 | Fumaric acid                   | 1261 | Parecoxib                               | 1761 | Valsartan                      |
| 262 | Brompheniramine (maleate)        | 762 | Furagin                        | 1262 | Parecoxib (Sodium)                      | 1762 | Vancomycin (hydrochloride)     |
| 263 | Bronopol                         | 763 | Furazolidone                   | 1263 | Pargyline (hydrochloride)               | 1763 | Vandetanib                     |
| 264 | Broxyquinoline                   | 764 | Furosemide                     | 1264 | Paritaprevir                            | 1764 | Vardenafil (hydrochloride)     |
| 265 | Bucladesine (calcium salt)       | 765 | Furosemide (sodium)            | 1265 | Paromomycin (sulfate)                   | 1765 | Varenicline                    |
| 266 | Bucladesine (sodium salt)        | 766 | Fursultiamine                  | 1266 | Paroxetine (hydrochloride)              | 1766 | Varenicline (Hydrochloride)    |
| 267 | Budesonide                       | 767 | Fusidic acid (sodium salt)     | 1267 | Pasinazid                               | 1767 | Varenicline (Tartrate)         |
| 268 | Bufexamac                        | 768 | Gabapentin                     | 1268 | Pasireotide (ditrifluoroacetate)        | 1768 | Vecuronium (bromide)           |
| 269 | Buflomedil (hydrochloride)       | 769 | Gabapentin (hydrochloride)     | 1269 | Pazopanib                               | 1769 | Velpatasvir                    |
| 270 | Bumetanide                       | 770 | Gabapentin enacarbil           | 1270 | Pazopanib (Hydrochloride)               | 1770 | Vemurafenib                    |
| 271 | Buspirone (hydrochloride)        | 771 | Gabexate (mesylate)            | 1271 | Pazufloxacin (mesylate)                 | 1771 | Venetoclax                     |
| 272 | Busulfan                         | 772 | Gadobutrol                     | 1272 | Peficitinib                             | 1772 | Venlafaxine (hydrochloride)    |
| 273 | Butamben                         | 773 | Gadodiamide                    | 1273 | Pefloxacin (mesylate)                   | 1773 | Verapamil (hydrochloride)      |
| 274 | Butenafine (Hydrochloride)       | 774 | Gadodiamide (hydrate)          | 1274 | Pemetrexed                              | 1774 | Vemakalant (Hydrochloride)     |
| 275 | Butoconazole (nitrate)           | 775 | Gadoxetate (Disodium)          | 1275 | Pemetrexed (disodium hemipenta hydrate) | 1775 | Verteporfin                    |
| 276 | Butylphthalide                   | 776 | Galanthamine                   | 1276 | Pemetrexed (disodium)                   | 1776 | Vesnarinone                    |
| 277 | Cabazitaxel                      | 777 | Galanthamine (hydrobromide)    | 1277 | Pemirolast (potassium)                  | 1777 | Vidarabine                     |
| 278 | Cabergoline                      | 778 | Gallamine Triethiodide         | 1278 | Penbutolol (sulfate)                    | 1778 | Vigabatrin                     |
| 279 | Cabozantinib                     | 779 | Gallic acid                    | 1279 | Penciclovir                             | 1779 | Vigabatrin (Hydrochloride)     |
| 280 | Cabozantinib (S-malate)          | 780 | Gamithromycin                  | 1280 | Penfluridol                             | 1780 | Vilanterol (trifenatate)       |
| 281 | Caffeic acid                     | 781 | Ganciclovir                    | 1281 | Penicillamine                           | 1781 | Vilazodone                     |
| 282 | Calcium dobesilate               | 782 | Garenoxacin (Mesylate hydrate) | 1282 | Pentamidine (isethionate)               | 1782 | Vilazodone (Hydrochloride)     |
| 283 | Camostat (mesylate)              | 783 | Gastrodenol                    | 1283 | Pentostatin                             | 1783 | Vildagliptin                   |
| 284 | Camphor                          | 784 | Gastrodin                      | 1284 | Pentoxifylline                          | 1784 | Vinblastine (sulfate)          |
| 285 | Canagliflozin                    | 785 | Gatifloxacin                   | 1285 | Peramivir (trihydrate)                  | 1785 | Vincamine                      |
| 286 | Canagliflozin (hemihydrate)      | 786 | Gefamate                       | 1286 | Pergolide (mesylate)                    | 1786 | Vinorelbine (ditartrate)       |
| 287 | Candesartan                      | 787 | Gefitinib                      | 1287 | Perhexiline maleate                     | 1787 | Vinpocetine                    |
| 288 | Candesartan (Cilexetil)          | 788 | Gefitinib (hydrochloride)      | 1288 | Perindopril (erbumine)                  | 1788 | Vismodegib                     |
| 289 | Canrenone                        | 789 | Gemcitabine                    | 1289 | Permethrin                              | 1789 | Vitamin B12                    |
| 290 | Capecitabine                     | 790 | Gemcitabine (hydrochloride)    | 1290 | Perphenazine                            | 1790 | Vitamin D2                     |
| 291 | Capreomycin (sulfate)            | 791 | Gemfibrozil                    | 1291 | Pexidartinib                            | 1791 | Vitamin K1                     |
| 292 | Capsaicin                        | 792 | Gemifloxacin (mesylate)        | 1292 | Pexidartinib (hydrochloride)            | 1792 | Voglibose                      |
| 293 | Captopril                        | 793 | Gestodene                      | 1293 | Phenazopyridine (hydrochloride)         | 1793 | Vonoprazan                     |
| 294 | Carbamazepine                    | 794 | Gestrinone                     | 1294 | Phenelzine (sulfate)                    | 1794 | Vonoprazan (Fumarate)          |
| 295 | Carbamoylcholine (chloride)      | 795 | Gimeracil                      | 1295 | Phenindione                             | 1795 | Vorapaxar                      |
| 296 | Carbazochrome (sodium sulfonate) | 796 | Glafenine (hydrochloride)      | 1296 | Pheniramine (Maleate)                   | 1796 | Voriconazole                   |
| 297 | Carbetapentane (citrate)         | 797 | Glasdegib                      | 1297 | Phenoxybenzamine (hydrochloride)        | 1797 | Vorinostat                     |

|     |                                        |     |                                    |      |                                |      |                                         |
|-----|----------------------------------------|-----|------------------------------------|------|--------------------------------|------|-----------------------------------------|
| 298 | Carbetocin                             | 798 | Glecaprevir                        | 1298 | Phenprocoumon                  | 1798 | Vortioxetine                            |
| 299 | Carbidopa                              | 799 | Glibenclamide                      | 1299 | Phentolamine (mesylate)        | 1799 | Vortioxetine (hydrobromide)             |
| 300 | Carbimazole                            | 800 | Glializide                         | 1300 | Phenylbutazone                 | 1800 | Warfarin                                |
| 301 | Carbinoxamine maleate salt             | 801 | Glimepiride                        | 1301 | Phenytoin                      | 1801 | Xylitol                                 |
| 302 | Carboxin                               | 802 | Glipizide                          | 1302 | Phenytoin (sodium)             | 1802 | Xylometazoline (hydrochloride)          |
| 303 | Carfilzomib                            | 803 | Gliquinone                         | 1303 | Phthalylsulfacetamide          | 1803 | Yohimbine (Hydrochloride)               |
| 304 | Carglumic Acid                         | 804 | Glucosate (Calcium)                | 1304 | Pidotimod                      | 1804 | Zafirlukast                             |
| 305 | Cariprazine                            | 805 | Glucosate (sodium)                 | 1305 | Pimavanserin                   | 1805 | Zalcitabine                             |
| 306 | Cariprazine (hydrochloride)            | 806 | Glucosamine (hydrochloride)        | 1306 | Pimavanserin tartrate          | 1806 | Zaltoprofen                             |
| 307 | Carmofur                               | 807 | Glycerol phenylbutyrate            | 1307 | Pimecrolimus                   | 1807 | Zanamivir                               |
| 308 | Carmustine                             | 808 | Glycine                            | 1308 | Pimozide                       | 1808 | Zidovudine                              |
| 309 | Carprofen                              | 809 | Glycopyrolate                      | 1309 | Pinaverium bromide             | 1809 | Zileuton                                |
| 310 | Carteolol hydrochloride                | 810 | Gonadorelin (acetate)              | 1310 | Pindolol                       | 1810 | Ziprasidone                             |
| 311 | Carvedilol                             | 811 | Goserelin (acetate)                | 1311 | Pioglitazone                   | 1811 | Ziprasidone (hydrochloride monohydrate) |
| 312 | Caspofungin (Acetate)                  | 812 | Gramicidin                         | 1312 | Pioglitazone (hydrochloride)   | 1812 | Zofenopril (calcium)                    |
| 313 | Catechin                               | 813 | Granisetron (Hydrochloride)        | 1313 | Pipemidic acid                 | 1813 | Zoledronic acid (monohydrate)           |
| 314 | Cefaclor                               | 814 | Grazoprevir                        | 1314 | Piperacillin (sodium)          | 1814 | Zonisamide                              |
| 315 | Cefadroxil                             | 815 | Grazoprevir potassium salt         | 1315 | Piperidolate                   | 1815 | $\alpha$ -Lipoic Acid                   |
| 316 | Cefamandole (nafate)                   | 816 | Griseofulvin                       | 1316 | Piperidolate (hydrochloride)   | 1816 | $\beta$ -Carotene                       |
| 317 | Cefazolin (sodium)                     | 817 | Guaecisal                          | 1317 | Piperonyl butoxide             |      |                                         |
| 318 | Cefdinir                               | 818 | Guaiaicol                          | 1318 | Pipobroman                     |      |                                         |
| 319 | Cefditoren (Pivoxil)                   | 819 | Guaifenesin                        | 1319 | Piracetam                      |      |                                         |
| 320 | Cefepime (Dihydrochloride Monohydrate) | 820 | Guanabenz (Acetate)                | 1320 | Pirarubicin (Hydrochloride)    |      |                                         |
| 321 | Cefixime                               | 821 | Guanethidine (sulfate)             | 1321 | Pirenzepine (dihydrochloride)  |      |                                         |
| 322 | Cefmenoxime (hydrochloride)            | 822 | Guanfacine (hydrochloride)         | 1322 | Pirfenidone                    |      |                                         |
| 323 | Cefmetazole (sodium)                   | 823 | Guanidine (hydrochloride)          | 1323 | Piribedil                      |      |                                         |
| 324 | Cefonicid (sodium)                     | 824 | Halcinonide                        | 1324 | Pimenoil (hydrochloride)       |      |                                         |
| 325 | Cefoperazone                           | 825 | Halobetasol (propionate)           | 1325 | Piroctone olamine              |      |                                         |
| 326 | Cefoperazone (sodium salt)             | 826 | Haloperidol                        | 1326 | Piromidic acid                 |      |                                         |
| 327 | Cefoselis (sulfate)                    | 827 | Helicid                            | 1327 | Piroxicam                      |      |                                         |
| 328 | Cefotaxime (sodium salt)               | 828 | Heparin (sodium salt)              | 1328 | Pitavastatin (Calcium)         |      |                                         |
| 329 | Cefoxitin (sodium)                     | 829 | Heptaminol (hydrochloride)         | 1329 | Pitolisant (hydrochloride)     |      |                                         |
| 330 | Cefozopran (hydrochloride)             | 830 | Hexachlorophene                    | 1330 | Pivmecillinam (hydrochloride)  |      |                                         |
| 331 | Cefprozil (monohydrate)                | 831 | Hexaminolevulinate (hydrochloride) | 1331 | Pixantrone (dimalate)          |      |                                         |
| 332 | Cefsulodin (sodium)                    | 832 | Hexylresorcinol                    | 1332 | Pizotifen                      |      |                                         |
| 333 | Ceftaroline fosamil                    | 833 | Histamine                          | 1333 | Plerixafor                     |      |                                         |
| 334 | Ceftazidime                            | 834 | Histamine (phosphate)              | 1334 | Plerixafor (octahydrochloride) |      |                                         |
| 335 | Ceftibuten (dihydrate)                 | 835 | Homatropine (Bromide)              | 1335 | Podofilox                      |      |                                         |
| 336 | Ceftizoxime                            | 836 | Homatropine (methylbromide)        | 1336 | Pomalidomide                   |      |                                         |
| 337 | Ceftriaxone (sodium salt)              | 837 | Homoharringtonine                  | 1337 | Ponatinib                      |      |                                         |
| 338 | Cefuroxime (sodium)                    | 838 | Hydralazine (hydrochloride)        | 1338 | Posaconazole                   |      |                                         |
| 339 | Celecoxib                              | 839 | Hydrocortisone                     | 1339 | Pralatrexate                   |      |                                         |
| 340 | Cephalexin                             | 840 | Hydrocortisone (acetate)           | 1340 | Pralidoxime (chloride)         |      |                                         |
| 341 | Cephalexin (monohydrate)               | 841 | Hydrocortisone 17-butyrate         | 1341 | Pramipexole (dihydrochloride)  |      |                                         |
| 342 | Cephalothin (sodium)                   | 842 | Hydrocortisone buteprate           | 1342 | Pramiracetam                   |      |                                         |
| 343 | Cephradine                             | 843 | Hydrocortisone cypionate           | 1343 | Pramocaine (hydrochloride)     |      |                                         |
| 344 | Ceritinib                              | 844 | Hydroquinidine                     | 1344 | Pranlukast                     |      |                                         |
| 345 | Ceritinib dihydrochloride              | 845 | Hydroxychloroquine sulfate         | 1345 | Pranlukast (hemihydrate)       |      |                                         |
| 346 | Cetilistat                             | 846 | Hydroxyfasudil                     | 1346 | Pranoprofen                    |      |                                         |
| 347 | Cetirizine (dihydrochloride)           | 847 | Hydroxyfasudil (hydrochloride)     | 1347 | Prasugrel                      |      |                                         |

|     |                                            |     |                                       |      |                                   |  |  |
|-----|--------------------------------------------|-----|---------------------------------------|------|-----------------------------------|--|--|
| 348 | Cetylpyridinium (chloride monohydrate)     | 848 | Hydroxyprogesterone caproate          | 1348 | Prasugrel (hydrochloride)         |  |  |
| 349 | Cevimeline (hydrochloride hemihydrate)     | 849 | Hydroxyurea                           | 1349 | Pravastatin (sodium)              |  |  |
| 350 | Cevimeline (hydrochloride)                 | 850 | Hydroxyzine (dihydrochloride)         | 1350 | Praziquantel                      |  |  |
| 351 | Chenodeoxycholic Acid                      | 851 | Ibandronate (Sodium Monohydrate)      | 1351 | Prazosin (hydrochloride)          |  |  |
| 352 | Chlorambucil                               | 852 | Ibrutinib                             | 1352 | Prednisolone                      |  |  |
| 353 | Chlorcyclizine (hydrochloride)             | 853 | Ibrutinib Racemate                    | 1353 | Prednisolone (21-acetate)         |  |  |
| 354 | Chlorhexidine                              | 854 | Ibudilast                             | 1354 | Prednisolone (disodium phosphate) |  |  |
| 355 | Chlorhexidine (digluconate)                | 855 | Ibuprofen                             | 1355 | Prednisone                        |  |  |
| 356 | Chlormadinone (acetate)                    | 856 | Ibuprofen piconol                     | 1356 | Prednisone acetate                |  |  |
| 357 | Chlormethine (hydrochloride)               | 857 | Ibutilide (fumarate)                  | 1357 | Pretomanid                        |  |  |
| 358 | Chlormezanone                              | 858 | Icatibant                             | 1358 | Prilocaine                        |  |  |
| 359 | Chlorocresol                               | 859 | Icotinib                              | 1359 | Primaquine (Diphosphate)          |  |  |
| 360 | Chloroquine (diphosphate)                  | 860 | Icotinib (Hydrochloride)              | 1360 | Primidone                         |  |  |
| 361 | Chlorothiazide                             | 861 | Idarubicin (hydrochloride)            | 1361 | Probenecid                        |  |  |
| 362 | Chloroxine                                 | 862 | Idebenone                             | 1362 | Probucof                          |  |  |
| 363 | Chlorpheniramine (maleate)                 | 863 | Idelalisib                            | 1363 | Procainamide (hydrochloride)      |  |  |
| 364 | Chlorphenoxamine                           | 864 | Idoxuridine                           | 1364 | Procarbazine (Hydrochloride)      |  |  |
| 365 | Chlorpropamide                             | 865 | Idramantone                           | 1365 | Procyclidine (hydrochloride)      |  |  |
| 366 | Chlorprothixene                            | 866 | Ifenprodil (tartrate)                 | 1366 | Progesterone                      |  |  |
| 367 | Chlorquinaldol                             | 867 | Iguratomod                            | 1367 | Proglumide                        |  |  |
| 368 | Chlortetracycline (hydrochloride)          | 868 | i-Inositol                            | 1368 | Proguanil                         |  |  |
| 369 | Chlorthalidone                             | 869 | Ilaprazole                            | 1369 | Promazine (hydrochloride)         |  |  |
| 370 | Chlorzoxazone                              | 870 | Iloperidone                           | 1370 | Propafenone (hydrochloride)       |  |  |
| 371 | Cholic acid                                | 871 | Iloprost                              | 1371 | Propantheline (bromide)           |  |  |
| 372 | Choline (chloride)                         | 872 | Imatinib                              | 1372 | Proparacaine (Hydrochloride)      |  |  |
| 373 | Choline Fenofibrate                        | 873 | Imatinib (Mesylate)                   | 1373 | Propoxycaïne (hydrochloride)      |  |  |
| 374 | Chromocarb                                 | 874 | Imidafenacin                          | 1374 | Propranolol (hydrochloride)       |  |  |
| 375 | Ciclesonide                                | 875 | Imidapril (hydrochloride)             | 1375 | Propylthiouracil                  |  |  |
| 376 | Ciclopiox                                  | 876 | Imipramine (hydrochloride)            | 1376 | Propyphenazone                    |  |  |
| 377 | Ciclopiox (olamine)                        | 877 | Imiquimod                             | 1377 | Prostaglandin E2                  |  |  |
| 378 | Cidofovir                                  | 878 | Imrecoxib                             | 1378 | Prothionamide                     |  |  |
| 379 | Cilastatin                                 | 879 | Indacaterol (maleate)                 | 1379 | Protoporphyrin IX                 |  |  |
| 380 | Cilazapril (monohydrate)                   | 880 | Indapamide                            | 1380 | Protriptyline (hydrochloride)     |  |  |
| 381 | Cilnidipine                                | 881 | Indinavir (sulfate)                   | 1381 | Proxyphylline                     |  |  |
| 382 | Cilostazol                                 | 882 | Indomethacin                          | 1382 | Prucalopride                      |  |  |
| 383 | Cinacalcet                                 | 883 | Ingenol                               | 1383 | Prucalopride (succinate)          |  |  |
| 384 | Cinacalcet (hydrochloride)                 | 884 | Inosine pranobex                      | 1384 | Prulifloxacin                     |  |  |
| 385 | Cinepazide (Maleate)                       | 885 | Iohexol                               | 1385 | Pyrantel (pamoate)                |  |  |
| 386 | Cinnarizine                                | 886 | Iopamidol                             | 1386 | Pyrantel (tartrate)               |  |  |
| 387 | Cinobufotalin                              | 887 | Iopanoic acid                         | 1387 | Pyrazinamide                      |  |  |
| 388 | Cinoxacin                                  | 888 | Iopromide                             | 1388 | Pyridostigmine (bromide)          |  |  |
| 389 | Ciprofibrate                               | 889 | Ioversol                              | 1389 | Pyridoxine (hydrochloride)        |  |  |
| 390 | Cisapride                                  | 890 | Ipratropium (bromide)                 | 1390 | Pyrimethamine                     |  |  |
| 391 | Cisatracurium (besylate)                   | 891 | Iproniazid (phosphate)                | 1391 | Pyriithoxin (dihydrochloride)     |  |  |
| 392 | Citalopram (hydrobromide)                  | 892 | Irbesartan                            | 1392 | Pyrvinium pamoate                 |  |  |
| 393 | Citicoline                                 | 893 | Irinotecan                            | 1393 | Quetiapine                        |  |  |
| 394 | Citicoline sodium salt                     | 894 | Irinotecan (hydrochloride trihydrate) | 1394 | Quetiapine (fumarate)             |  |  |
| 395 | Citric acid                                | 895 | Irinotecan (hydrochloride)            | 1395 | Quinagolide (hydrochloride)       |  |  |
| 396 | Citric acid (trilithium salt tetrahydrate) | 896 | Irsogladine                           | 1396 | Quinapril (hydrochloride)         |  |  |
| 397 | Cladribine                                 | 897 | Isoconazole (nitrate)                 | 1397 | Quinestrol                        |  |  |



|     |                                              |     |                                       |      |                                     |  |  |
|-----|----------------------------------------------|-----|---------------------------------------|------|-------------------------------------|--|--|
| 398 | Clarithromycin                               | 898 | Isoniazid                             | 1398 | Quinidine                           |  |  |
| 399 | Clebopride (malate)                          | 899 | Isosorbide                            | 1399 | Quinidine hydrochloride monohydrate |  |  |
| 400 | Clemastine (fumarate)                        | 900 | Isosorbide mononitrate                | 1400 | Quinine                             |  |  |
| 401 | Clemizole (hydrochloride)                    | 901 | Isotretinoin                          | 1401 | Quinine (hydrochloride dihydrate)   |  |  |
| 402 | Clevodipine                                  | 902 | Isradipine                            | 1402 | Rabeprazole (sodium)                |  |  |
| 403 | Clevudine                                    | 903 | Istradefylline                        | 1403 | Raccadotril                         |  |  |
| 404 | Clindamycin (hydrochloride)                  | 904 | Itopride (hydrochloride)              | 1404 | Raloxifene (hydrochloride)          |  |  |
| 405 | Clindamycin (phosphate)                      | 905 | Itraconazole                          | 1405 | Raltegravir                         |  |  |
| 406 | Clinofibrate                                 | 906 | Ivabradine (hydrochloride)            | 1406 | Raltegravir (potassium salt)        |  |  |
| 407 | Clioquinol                                   | 907 | Ivacaftor                             | 1407 | Raltitrexed                         |  |  |
| 408 | Clobetasol propionate                        | 908 | Ivermectin                            | 1408 | Ramatroban                          |  |  |
| 409 | Clofarabine                                  | 909 | Ivosidenib                            | 1409 | Ramelteon                           |  |  |
| 410 | Clofazimine                                  | 910 | Ixabepilone                           | 1410 | Ramipril                            |  |  |
| 411 | Clofibrate                                   | 911 | Ixazomib                              | 1411 | Ramosetron (Hydrochloride)          |  |  |
| 412 | Clofibric acid                               | 912 | Ixazomib citrate                      | 1412 | Ranitidine (hydrochloride)          |  |  |
| 413 | Clofoctol                                    | 913 | Josamycin                             | 1413 | Ranolazine                          |  |  |
| 414 | Clomiphene (citrate)                         | 914 | JQ-1                                  | 1414 | Ranolazine (dihydrochloride)        |  |  |
| 415 | Clomipramine (hydrochloride)                 | 915 | Kanamycin (sulfate)                   | 1415 | Rasagiline (mesylate)               |  |  |
| 416 | Clonidine (hydrochloride)                    | 916 | Kasugamycin (hydrochloride hydrate)   | 1416 | Rauwolfscine (hydrochloride)        |  |  |
| 417 | Cloperastine fendizoate                      | 917 | Ketanserin                            | 1417 | Rebamipide                          |  |  |
| 418 | Clopidogrel (hydrogen sulfate)               | 918 | Ketanserin (tartrate)                 | 1418 | Reboxetine (mesylate)               |  |  |
| 419 | Cloprenaline hydrochloride                   | 919 | Ketoconazole                          | 1419 | Regadenoson                         |  |  |
| 420 | Clotrimazole                                 | 920 | Ketoprofen                            | 1420 | Regorafenib                         |  |  |
| 421 | Cloxacillin (sodium monohydrate)             | 921 | Ketorolac (tromethamine salt)         | 1421 | Regorafenib (Hydrochloride)         |  |  |
| 422 | Clozapine                                    | 922 | Ketotifen (fumarate)                  | 1422 | Regorafenib (monohydrate)           |  |  |
| 423 | Cobicistat                                   | 923 | L-(-)- $\alpha$ -Methyldopa (hydrate) | 1423 | Relugolix                           |  |  |
| 424 | Cobimetinib                                  | 924 | L-5-Hydroxytryptophan                 | 1424 | Repaglinide                         |  |  |
| 425 | Cobimetinib (hemifumarate)                   | 925 | Labetalol (hydrochloride)             | 1425 | Reserpine                           |  |  |
| 426 | Cobimetinib (racemate)                       | 926 | Lacidipine                            | 1426 | Reserpine (hydrochloride)           |  |  |
| 427 | Colchicine                                   | 927 | Lactulose                             | 1427 | Resorcinol                          |  |  |
| 428 | Colistin (sulfate)                           | 928 | Lafutidine                            | 1428 | Resveratrol                         |  |  |
| 429 | Conivaptan (hydrochloride)                   | 929 | Lamivudine                            | 1429 | Retapamulin                         |  |  |
| 430 | Cortisone                                    | 930 | Lamotrigine                           | 1430 | Retinoic acid                       |  |  |
| 431 | Cortisone (acetate)                          | 931 | Lanatoside C                          | 1431 | Retinol                             |  |  |
| 432 | Crisaborole                                  | 932 | Lansoprazole                          | 1432 | Revefenacin                         |  |  |
| 433 | Crizotinib                                   | 933 | Lapatinib                             | 1433 | Ribavirin                           |  |  |
| 434 | Crizotinib (hydrochloride)                   | 934 | Lapatinib (ditosylate)                | 1434 | Ribociclib                          |  |  |
| 435 | Cromolyn (sodium)                            | 935 | L-Arginine                            | 1435 | Ribociclib hydrochloride            |  |  |
| 436 | Crotamiton                                   | 936 | L-Arginine (hydrochloride)            | 1436 | Ribociclib succinate                |  |  |
| 437 | Cyclandelate                                 | 937 | Laropiprant                           | 1437 | Ribociclib succinate hydrate        |  |  |
| 438 | Cyclic somatostatin                          | 938 | Larotrectinib                         | 1438 | Riboflavin Tetrabutryate            |  |  |
| 439 | Cyclobenzaprine (hydrochloride)              | 939 | Larotrectinib sulfate                 | 1439 | Ribostamycin (sulfate)              |  |  |
| 440 | Cyclosporin A                                | 940 | L-Ascorbic acid                       | 1440 | Rifabutin                           |  |  |
| 441 | Cyproheptadine (hydrochloride sesquihydrate) | 941 | L-Ascorbic acid sodium salt           | 1441 | Rifampicin                          |  |  |
| 442 | Cyproheptadine (hydrochloride)               | 942 | Lasofixifene (Tartrate)               | 1442 | Rifapentine                         |  |  |
| 443 | Cyproterone (acetate)                        | 943 | Latanoprost                           | 1443 | Rifaximin                           |  |  |
| 444 | Cysteamine                                   | 944 | Latrepirdine (dihydrochloride)        | 1444 | Rilpivirine                         |  |  |
| 445 | Cysteamine hydrochloride                     | 945 | L-Cysteine                            | 1445 | Riluzole                            |  |  |
| 446 | Cytarabine                                   | 946 | LCZ696                                | 1446 | Riluzole hydrochloride              |  |  |
| 447 | Cytidine                                     | 947 | Lecithin                              | 1447 | Rimantadine (hydrochloride)         |  |  |

|     |                                               |     |                                          |      |                                         |  |  |
|-----|-----------------------------------------------|-----|------------------------------------------|------|-----------------------------------------|--|--|
| 448 | Cytisinicline                                 | 948 | Ledipasvir                               | 1448 | Riociguat                               |  |  |
| 449 | Dabigatran etexilate                          | 949 | Ledipasvir (acetone)                     | 1449 | Ripasudil                               |  |  |
| 450 | Dabigatran etexilate (mesylate)               | 950 | Ledipasvir (D-tartrate)                  | 1450 | Risedronate (sodium)                    |  |  |
| 451 | Dabrafenib                                    | 951 | Leflunomide                              | 1451 | Risperidone                             |  |  |
| 452 | Dabrafenib (Mesylate)                         | 952 | Lenalidomide                             | 1452 | Ritonavir                               |  |  |
| 453 | Dacarbazine                                   | 953 | Lenalidomide (hemihydrate)               | 1453 | Rivaroxaban                             |  |  |
| 454 | Daclatasvir                                   | 954 | Lenvatinib                               | 1454 | Rivastigmine                            |  |  |
| 455 | Daclatasvir (dihydrochloride)                 | 955 | L-Epinephrine (Bitartrate)               | 1455 | Rivastigmine (tartrate)                 |  |  |
| 456 | Dacomitinib                                   | 956 | Lercanidipine (hydrochloride)            | 1456 | Rocuronium (Bromide)                    |  |  |
| 457 | Dalbavancin                                   | 957 | Lesinurad                                | 1457 | Rofecoxib                               |  |  |
| 458 | Danazol                                       | 958 | Lesinurad (sodium)                       | 1458 | Roflumilast                             |  |  |
| 459 | Danofloxacin (mesylate)                       | 959 | Letrozole                                | 1459 | Rolapitant                              |  |  |
| 460 | Danoprevir                                    | 960 | Leuprolide Acetate                       | 1460 | Ronidazole                              |  |  |
| 461 | Danthron                                      | 961 | Levamisole (hydrochloride)               | 1461 | Ropinirole (hydrochloride)              |  |  |
| 462 | Dantrolene (sodium hemiheptahydrate)          | 962 | Levetiracetam                            | 1462 | Ropivacaine (hydrochloride monohydrate) |  |  |
| 463 | Dapagliflozin                                 | 963 | Levobetaxolol (hydrochloride)            | 1463 | Ropivacaine hydrochloride               |  |  |
| 464 | Dapagliflozin ((2S)-1,2-propanediol, hydrate) | 964 | Levobunolol (hydrochloride)              | 1464 | Rosiglitazone                           |  |  |
| 465 | Dapiprazole (hydrochloride)                   | 965 | Levobupivacaine (hydrochloride)          | 1465 | Rosiglitazone (malate)                  |  |  |
| 466 | Dapoxetine (hydrochloride)                    | 966 | Levocarnitine propionate (hydrochloride) | 1466 | Rosuvastatin (Calcium)                  |  |  |
| 467 | Dapsone                                       | 967 | Levodropropizine                         | 1467 | Rotigotine                              |  |  |
| 468 | Daptomycin                                    | 968 | Levofloxacin                             | 1468 | Rotigotine (Hydrochloride)              |  |  |
| 469 | Darifenacin (hydrobromide)                    | 969 | Levofloxacin (hydrate)                   | 1469 | Rotundine                               |  |  |
| 470 | Darunavir                                     | 970 | Levoleucovorin (Calcium)                 | 1470 | Roxadustat                              |  |  |
| 471 | Darunavir (Ethanolate)                        | 971 | Levosimendan                             | 1471 | Roxatidine (Acetate Hydrochloride)      |  |  |
| 472 | Dasabuvir                                     | 972 | Levosulpiride                            | 1472 | Roxithromycin                           |  |  |
| 473 | Dasatinib                                     | 973 | L-Glutamic acid monosodium salt          | 1473 | Rucaparib (Camsylate)                   |  |  |
| 474 | Dasatinib (hydrochloride)                     | 974 | L-Glutamine                              | 1474 | Rucaparib (phosphate)                   |  |  |
| 475 | Daunorubicin (Hydrochloride)                  | 975 | Lidocaine                                | 1475 | Rufinamide                              |  |  |
| 476 | D-Cycloserine                                 | 976 | Lidocaine (hydrochloride)                | 1476 | Rupatadine (Fumarate)                   |  |  |
| 477 | Decamethonium (Bromide)                       | 977 | Lifitegrast                              | 1477 | Rutin                                   |  |  |
| 478 | Decitabine                                    | 978 | Limaprost                                | 1478 | Ruxolitinib                             |  |  |
| 479 | Declozine (dihydrochloride)                   | 979 | Linagliptin                              | 1479 | Ruxolitinib (phosphate)                 |  |  |
| 480 | Deferasirox                                   | 980 | Lincomycin (hydrochloride hydrate)       | 1480 | S-(+)-Ketoprofen                        |  |  |
| 481 | Deferasirox (Fe <sup>3+</sup> chelate)        | 981 | Linezolid                                | 1481 | Sacubitril                              |  |  |
| 482 | Deferiprone                                   | 982 | Liothyronine                             | 1482 | Sacubitril hemicalcium salt             |  |  |
| 483 | Deferoxamine (mesylate)                       | 983 | Liothyronine (sodium)                    | 1483 | Safinamide                              |  |  |
| 484 | Deflazacort                                   | 984 | Lisinopril (dihydrate)                   | 1484 | Salbutamol (hemisulfate)                |  |  |
| 485 | Degarelix                                     | 985 | L-Lactic acid                            | 1485 | Salicylic acid                          |  |  |
| 486 | Dehydrocholic acid                            | 986 | Lodenafil                                | 1486 | Salmeterol                              |  |  |
| 487 | Delafloxacin (meglumine)                      | 987 | Lodoxamide                               | 1487 | Salmeterol (xinafoate)                  |  |  |
| 488 | Delamanid                                     | 988 | Lodoxamide (tromethamine)                | 1488 | Salsalate                               |  |  |
| 489 | Delavirdine (mesylate)                        | 989 | Lofexidine                               | 1489 | Santonin                                |  |  |
| 490 | Demecarium Bromide                            | 990 | Lomefloxacin (hydrochloride)             | 1490 | Sapacitabine                            |  |  |
| 491 | Demeclocycline (hydrochloride)                | 991 | Lomerizine dihydrochloride               | 1491 | Sapropterin (dihydrochloride)           |  |  |
| 492 | Deoxycholic acid                              | 992 | Lomitapide                               | 1492 | Saquinavir                              |  |  |
| 493 | Deoxycholic acid sodium salt                  | 993 | Lomustine                                | 1493 | Saquinavir (Mesylate)                   |  |  |
| 494 | Deoxycorticosterone (acetate)                 | 994 | Loperamide (hydrochloride)               | 1494 | Sarpogrelate (hydrochloride)            |  |  |
| 495 | Dequalinium (Chloride)                        | 995 | Lopinavir                                | 1495 | Saxagliptin                             |  |  |
| 496 | Deracoxib                                     | 996 | Loratadine                               | 1496 | Scopolamine (hydrobromide)              |  |  |
| 497 | Desipramine hydrochloride                     | 997 | Lorlatinib                               | 1497 | Scopolamine butylbromide                |  |  |

|     |               |      |             |      |                  |  |  |
|-----|---------------|------|-------------|------|------------------|--|--|
| 498 | Desloratadine | 998  | L-Ornithine | 1498 | Secnidazole      |  |  |
| 499 | Desogestrel   | 999  | Lomoxicam   | 1499 | Selamectin       |  |  |
| 500 | Desonide      | 1000 | Losartan    | 1500 | Selenomethionine |  |  |
