# Supplementary material for: Phenotypical screening on metastatic PRCC-TFE3 fusion translocation renal cell carcinoma organoids reveals potential therapeutic agents
Source: Springer Nature journal article supplement (doi:10.1007/s12094-021-02774-8), 2022-02-03
Supplement: MOESM3 [file 20097814]

Supplementary Data 2. The list of selected 57 non-chemotherapy drugs

| No | Product Name                     | No | Product Name                           |
|----|----------------------------------|----|----------------------------------------|
| 1  | Abacavir                         | 31 | Lenalidomide (hemihydrate)             |
| 2  | Acebutolol (hydrochloride)       | 32 | Loteprednol Etabonate                  |
| 3  | Acitretin                        | 33 | L-Thyroxine (sodium salt pentahydrate) |
| 4  | Axitinib                         | 34 | Lubiprostone                           |
| 5  | Balsalazide                      | 35 | Meclofenoxate (hydrochloride)          |
| 6  | Belinostat                       | 36 | Metergoline                            |
| 7  | Bortezomib                       | 37 | Mexiletine (hydrochloride)             |
| 8  | Cabozantinib                     | 38 | Midostaurin                            |
| 9  | Carbazochrome (sodium sulfonate) | 39 | Miltefosine                            |
| 10 | Ceritinib dihydrochloride        | 40 | Mirabegron                             |
| 11 | Chlorphenoxamine                 | 41 | Nabumetone                             |
| 12 | Cobimetinib (racemate)           | 42 | Niclosamide                            |
| 13 | Cobimetinib (racemate)           | 43 | Otilonium (bromide)                    |
| 14 | crotinib                         | 44 | Ouabain (Octahydrate)                  |
| 15 | Dacomitinib                      | 45 | Panobinostat                           |
| 16 | Diphenylpyraline (hydrochloride) | 46 | Phenytoin                              |
| 17 | Ebastine                         | 47 | Ponatinib                              |
| 18 | Elafibranor                      | 48 | Pyrvinium pamoate                      |
| 19 | Emetine (dihydrochloride)        | 49 | Rivastigmine (tartrate)                |
| 20 | Entrectinib                      | 50 | Rotundine                              |
| 21 | Estradiol (cypionate)            | 51 | Salmeterol (xinafoate)                 |
| 22 | Fimasartan                       | 52 | Setiptiline                            |
| 23 | Fostamatinib Disodium            | 53 | Sunitinib                              |
| 24 | Homoharringtonine                | 54 | Teneligliptin                          |
| 25 | Hydrocortisone 17-butyrate       | 55 | Upadacitinib                           |
| 26 | Ingenol                          | 56 | Vandetanib                             |
| 27 | Ixazomib                         | 57 | Yohimbine (Hydrochloride)              |
| 28 | Ixazomib citrate                 |    |                                        |
| 29 | JQ-1                             |    |                                        |
| 30 | Ketanserin                       |    |                                        |
