# Supplementary material for: Phenotypical screening on metastatic PRCC-TFE3 fusion translocation renal cell carcinoma organoids reveals potential therapeutic agents
Source: Springer Nature journal article supplement (doi:10.1007/s12094-021-02774-8), 2022-02-03
Supplement: MOESM4 [file 20097814]

Supplementary Data 3. Differential gene lists of the organoid after treatments according to the RNA-seq

| Upgraded Genes of Axitinib-High Dose Group (10) |         |             |    |         |                   |
|-------------------------------------------------|---------|-------------|----|---------|-------------------|
| No                                              | Gene ID | Gene Symbol | No | Gene ID | Gene Symbol       |
| 1                                               | 1028    | 'CDKN1C'    | 6  | 2354    | 'FOSB'            |
| 2                                               | 1277    | 'COL1A1'    | 7  | 407977  | 'TNFSF12-TNFSF13' |
| 3                                               | 1356    | 'CP'        | 8  | 4586    | 'MUC5AC'          |
| 4                                               | 2252    | 'FGF7'      | 9  | 5764    | 'PTN'             |
| 5                                               | 2335    | 'FNI'       | 10 | 92815   | 'H2AW'            |

| Downgraded Genes of Axitinib-High Dose Group (1) |           |              |
|--------------------------------------------------|-----------|--------------|
| No                                               | Gene ID   | Gene Symbol  |
| 1                                                | 100529241 | 'HSPE1-MOB4' |

| Upgraded Genes of JQ1-High Dose Group (8) |         |             |    |         |             |
|-------------------------------------------|---------|-------------|----|---------|-------------|
| No                                        | Gene ID | Gene Symbol | No | Gene ID | Gene Symbol |
| 1                                         | 1490    | 'CCN2'      | 5  | 4318    | 'MMP9'      |
| 2                                         | 2121    | 'EVC'       | 6  | 60676   | 'PAPPA2'    |
| 3                                         | 23089   | 'PEG10'     | 7  | 79057   | 'PRRG3'     |
| 4                                         | 3553    | 'IL1B'      | 8  | 8363    | 'H4C11'     |

| Downgraded Genes of JQ1-High Dose Group (28) |         |             |    |         |                   |    |         |             |    |         |             |
|----------------------------------------------|---------|-------------|----|---------|-------------------|----|---------|-------------|----|---------|-------------|
| No                                           | Gene ID | Gene Symbol | No | Gene ID | Gene Symbol       | No | Gene ID | Gene Symbol | No | Gene ID | Gene Symbol |
| 1                                            | 10158   | 'PDZK1IP1'  | 8  | 3934    | 'LCN2'            | 15 | 6398    | 'SECTM1'    | 22 | 80115   | 'BAIAP2L2'  |
| 2                                            | 10786   | 'SLC17A3'   | 9  | 4057    | 'LTF'             | 16 | 6568    | 'SLC17A1'   | 23 | 80149   | 'ZC3H12A'   |
| 3                                            | 12      | 'SERPINA3'  | 10 | 407977  | 'TNFSF12-TNFSF13' | 17 | 6750    | 'SST'       | 24 | 81557   | 'MAGED4B'   |
| 4                                            | 2243    | 'FGA'       | 11 | 5265    | 'SERPINA1'        | 18 | 7127    | 'TNFAIP2'   | 25 | 84465   | 'MEGF11'    |
| 5                                            | 2919    | 'CXCL1'     | 12 | 6288    | 'SAA1'            | 19 | 718     | 'C3'        | 26 | 84929   | 'FIBCD1'    |
| 6                                            | 2920    | 'CXCL2'     | 13 | 6289    | 'SAA2'            | 20 | 720     | 'C4A'       | 27 | 9075    | 'CLDN2'     |
| 7                                            | 3868    | 'KRT16'     | 14 | 6347    | 'CCL2'            | 21 | 728441  | 'GGT2'      | 28 | 9476    | 'NAPSA'     |

| Upgraded Genes of Crizotinib-High Dose Group (364) |           |                |     |         |             |
|----------------------------------------------------|-----------|----------------|-----|---------|-------------|
| No                                                 | Gene ID   | Gene Symbol    | No  | Gene ID | Gene Symbol |
| 1                                                  | 10000     | 'AKT3'         | 201 | 440345  | 'NPIP4'     |
| 2                                                  | 100037417 | 'DDTL'         | 202 | 440503  | 'PLIN5'     |
| 3                                                  | 100132247 | 'NPIPB5'       | 203 | 4548    | 'MTR'       |
| 4                                                  | 100137049 | 'PLA2G4B'      | 204 | 4616    | 'GADD45B'   |
| 5                                                  | 10018     | 'BCL2L11'      | 205 | 4649    | 'MYO9A'     |
| 6                                                  | 100288695 | 'LIMS4'        | 206 | 472     | 'ATM'       |
| 7                                                  | 100293534 | 'C4B 2'        | 207 | 4739    | 'NEDD9'     |
| 8                                                  | 100462977 | 'MTRNR2L1'     | 208 | 4779    | 'NFE2L1'    |
| 9                                                  | 100462981 | 'MTRNR2L2'     | 209 | 4881    | 'NPR1'      |
| 10                                                 | 100462983 | 'MTRNR2L3'     | 210 | 5047    | 'PAEP'      |
| 11                                                 | 100463285 | 'MTRNR2L4'     | 211 | 50486   | 'GOS2'      |
| 12                                                 | 100463482 | 'MTRNR2L6'     | 212 | 5074    | 'PAWR'      |
| 13                                                 | 100463486 | 'MTRNR2L8'     | 213 | 51005   | 'AMDHD2'    |
| 14                                                 | 100463487 | 'MTRNR2L9'     | 214 | 51176   | 'LEF1'      |
| 15                                                 | 100463488 | 'MTRNR2L10'    | 215 | 51309   | 'ARMCX1'    |
| 16                                                 | 100526783 | 'ARPIN-AP3S2'  | 216 | 51365   | 'PLA1A'     |
| 17                                                 | 100529241 | 'HSPE1-MOB4'   | 217 | 51454   | 'GULP1'     |
| 18                                                 | 101060226 | 'NBPF19'       | 218 | 5166    | 'PDK4'      |
| 19                                                 | 10157     | 'AASS'         | 219 | 51696   | 'HECA'      |
| 20                                                 | 10158     | 'PDZK1IP1'     | 220 | 5208    | 'PFKFB2'    |
| 21                                                 | 10170     | 'DHRS9'        | 221 | 523     | 'ATP6V1A'   |
| 22                                                 | 102723996 | 'LOC102723996' | 222 | 5292    | 'PIM1'      |

| Downgraded Genes of Crizotinib-High Dose Group (671) |           |                |     |         |             |     |         |              |     |         |             |
|------------------------------------------------------|-----------|----------------|-----|---------|-------------|-----|---------|--------------|-----|---------|-------------|
| No                                                   | Gene ID   | Gene Symbol    | No  | Gene ID | Gene Symbol | No  | Gene ID | Gene Symbol  | No  | Gene ID | Gene Symbol |
| 1                                                    | 1001      | 'CDH3'         | 201 | 2678    | 'GGT1'      | 401 | 55355   | 'HJURP'      | 601 | 84634   | 'KISS1R'    |
| 2                                                    | 10024     | 'TROPAP'       | 202 | 2683    | 'B4GALT1'   | 402 | 55450   | 'CAMK2N1'    | 602 | 84675   | 'TRIM55'    |
| 3                                                    | 10050     | 'SLC17A4'      | 203 | 2702    | 'GJA5'      | 403 | 5549    | 'PRELP'      | 603 | 84790   | 'TUBA1C'    |
| 4                                                    | 100505385 | 'IQCJ-SCHIP1'  | 204 | 2703    | 'GJA8'      | 404 | 55723   | 'ASF1B'      | 604 | 84915   | 'FAM222A'   |
| 5                                                    | 100527963 | 'PMF1-BGLAP'   | 205 | 2707    | 'GJB3'      | 405 | 5578    | 'PRKCA'      | 605 | 84929   | 'FIBCD1'    |
| 6                                                    | 100528064 | 'NEDD8-MDPI'   | 206 | 27143   | 'PALD1'     | 406 | 55790   | 'CSGALNACT1' | 606 | 84952   | 'CGNL1'     |
| 7                                                    | 10058     | 'ABCB6'        | 207 | 27286   | 'SRPX2'     | 407 | 55806   | 'HR'         | 607 | 8497    | 'PPF1A4'    |
| 8                                                    | 1009      | 'CDH11'        | 208 | 2731    | 'GLDC'      | 408 | 55872   | 'PBK'        | 608 | 8503    | 'PIK3R3'    |
| 9                                                    | 10103     | 'TSPAN1'       | 209 | 27329   | 'ANGPTL3'   | 409 | 55879   | 'GABRQ'      | 609 | 8522    | 'GAS7'      |
| 10                                                   | 10112     | 'KIF20A'       | 210 | 27345   | 'KCNCB4'    | 410 | 5596    | 'MAPK4'      | 610 | 8543    | 'LMO4'      |
| 11                                                   | 10203     | 'CALCRL'       | 211 | 2743    | 'GLRB'      | 411 | 55966   | 'AJAP1'      | 611 | 8573    | 'CASK'      |
| 12                                                   | 10220     | 'GDF11'        | 212 | 2810    | 'SFN'       | 412 | 5606    | 'MAP2K3'     | 612 | 8635    | 'RNASET2'   |
| 13                                                   | 102723360 | 'LOC102723360' | 213 | 283455  | 'KSR2'      | 413 | 5608    | 'MAP2K6'     | 613 | 866     | 'SERPINA6'  |
| 14                                                   | 102724594 | 'U2AF1L5'      | 214 | 284     | 'ANGPT1'    | 414 | 56245   | 'C21orf62'   | 614 | 8701    | 'DNAH11'    |
| 15                                                   | 1028      | 'CDKN1C'       | 215 | 284040  | 'CALR'      | 415 | 56265   | 'CPXM1'      | 615 | 871     | 'SERPINH1'  |
| 16                                                   | 10290     | 'SPEG'         | 216 | 284297  | 'SSC5D'     | 416 | 5653    | 'KLK6'       | 616 | 8745    | 'ADAM23'    |
| 17                                                   | 10376     | 'TUBA1B'       | 217 | 284403  | 'WDR62'     | 417 | 5654    | 'HTRA1'      | 617 | 8771    | 'TNFRSF6B'  |
| 18                                                   | 10382     | 'TUBB4A'       | 218 | 284716  | 'RIMKLA'    | 418 | 56603   | 'CYP26B1'    | 618 | 8796    | 'SCEL'      |
| 19                                                   | 10383     | 'TUBB4B'       | 219 | 285016  | 'ALKAL2'    | 419 | 56649   | 'TMPRSS4'    | 619 | 8817    | 'FGF18'     |
| 20                                                   | 10398     | 'MYL9'         | 220 | 285489  | 'DOK7'      | 420 | 56944   | 'OLFML3'     | 620 | 8828    | 'NRP2'      |
| 21                                                   | 10406     | 'WFDC2'        | 221 | 2893    | 'GRIA4'     | 421 | 56992   | 'KIF15'      | 621 | 890     | 'CCNA2'     |
| 22                                                   | 10409     | 'BASP1'        | 222 | 28969   | 'BZW2'      | 422 | 57106   | 'NAT14'      | 622 | 8900    | 'CCNA1'     |

|    |           |                |     |        |            |
|----|-----------|----------------|-----|--------|------------|
| 23 | 1030      | 'CDKN2B'       | 223 | 5364   | 'PLXNB1'   |
| 24 | 10350     | 'ABCA9'        | 224 | 54206  | 'ERRF1'    |
| 25 | 10370     | 'CITED2'       | 225 | 54463  | 'RETREG1'  |
| 26 | 10417     | 'SPON2'        | 226 | 54507  | 'ADAMTSL4' |
| 27 | 10457     | 'GPNMB'        | 227 | 54520  | 'CCDC93'   |
| 28 | 10493     | 'VATI'         | 228 | 54557  | 'SGTB'     |
| 29 | 105379547 | 'LOC105379547' | 229 | 54600  | 'UGT1A9'   |
| 30 | 10579     | 'TACC2'        | 230 | 54741  | 'LEPROT'   |
| 31 | 10628     | 'TXNIP'        | 231 | 54762  | 'GRAMD1C'  |
| 32 | 10826     | 'FAXDC2'       | 232 | 54800  | 'KLHL24'   |
| 33 | 10840     | 'ALDH1L1'      | 233 | 54893  | 'MTMR10'   |
| 34 | 10891     | 'PPARGC1A'     | 234 | 54913  | 'RPP25'    |
| 35 | 10924     | 'SMPDL3A'      | 235 | 55102  | 'ATG2B'    |
| 36 | 10966     | 'RAB40B'       | 236 | 55238  | 'SLC38A7'  |
| 37 | 11056     | 'DDX52'        | 237 | 55251  | 'PCMTD2'   |
| 38 | 11067     | 'DEPP1'        | 238 | 55281  | 'TMEM140'  |
| 39 | 11076     | 'TPPP'         | 239 | 55289  | 'ACOXL'    |
| 40 | 1112      | 'FOXN3'        | 240 | 55326  | 'AGPAT5'   |
| 41 | 1116      | 'CHI3L1'       | 241 | 55356  | 'SLC22A15' |
| 42 | 1122      | 'CHML'         | 242 | 55616  | 'ASAP3'    |
| 43 | 112268437 | 'LOC112268437' | 243 | 55638  | 'SYBU'     |
| 44 | 112849    | 'L3HYPDH'      | 244 | 5565   | 'PRKAB2'   |
| 45 | 113455421 | 'DERPC'        | 245 | 56548  | 'CHST7'    |
| 46 | 113791    | 'PIK3IP1'      | 246 | 56670  | 'SUCNR1'   |
| 47 | 114876    | 'OSBPL1A'      | 247 | 56957  | 'OTUD7B'   |
| 48 | 1154      | 'CISH'         | 248 | 56997  | 'COQ8A'    |
| 49 | 116150    | 'NUS1'         | 249 | 57035  | 'RSRP1'    |
| 50 | 117248    | 'GALNT15'      | 250 | 5733   | 'PTGER3'   |
| 51 | 118881    | 'COMTD1'       | 251 | 57475  | 'PLEKHH1'  |
| 52 | 1201      | 'CLN3'         | 252 | 57486  | 'NLN'      |
| 53 | 1241      | 'LTB4R'        | 253 | 57494  | 'RIMKLB'   |
| 54 | 124961    | 'ZFP3'         | 254 | 57509  | 'MTUS1'    |
| 55 | 1268      | 'CNR1'         | 255 | 57600  | 'FNIP2'    |
| 56 | 127018    | 'LYPLAL1'      | 256 | 57687  | 'VATIL'    |
| 57 | 130271    | 'PLEKHH2'      | 257 | 57728  | 'WDR19'    |
| 58 | 1316      | 'KLF6'         | 258 | 5797   | 'PTPRM'    |
| 59 | 134285    | 'TMEM171'      | 259 | 58528  | 'RRAGD'    |
| 60 | 135398    | 'C6orf141'     | 260 | 5934   | 'RBL2'     |
| 61 | 137075    | 'CLDN23'       | 261 | 5950   | 'RBP4'     |
| 62 | 1374      | 'CPT1A'        | 262 | 5973   | 'RENBP'    |
| 63 | 137872    | 'ADHFE1'       | 263 | 60468  | 'BACH2'    |
| 64 | 139221    | 'PWWP3B'       | 264 | 606495 | 'CYB5RL'   |
| 65 | 140453    | 'MUC17'        | 265 | 6097   | 'RORC'     |
| 66 | 145741    | 'C2CD4A'       | 266 | 6324   | 'SCN1B'    |
| 67 | 1462      | 'VCAN'         | 267 | 6398   | 'SECTM1'   |
| 68 | 1469      | 'CST1'         | 268 | 64123  | 'ADGRL4'   |
| 69 | 150465    | 'TTL'          | 269 | 643338 | 'C15orf62' |
| 70 | 151230    | 'KLHL23'       | 270 | 64342  | 'HS1BP3'   |
| 71 | 151449    | 'GDF7'         | 271 | 643707 | 'GOLGA6L4' |
| 72 | 151525    | 'WDSUB1'       | 272 | 6484   | 'ST3GAL4'  |

|    |           |                 |     |        |            |     |        |            |     |       |            |
|----|-----------|-----------------|-----|--------|------------|-----|--------|------------|-----|-------|------------|
| 23 | 10418     | 'SPON1'         | 223 | 2904   | 'GRIN2B'   | 423 | 57224  | 'NHSL1'    | 623 | 891   | 'CCNB1'    |
| 24 | 10460     | 'TACC3'         | 224 | 29108  | 'PYCARD'   | 424 | 5724   | 'PTAFR'    | 624 | 8913  | 'CACNA1G'  |
| 25 | 1050      | 'CEBPA'         | 225 | 29128  | 'UHFR1'    | 425 | 5728   | 'PTEN'     | 625 | 89765 | 'RSPH1'    |
| 26 | 10509     | 'SEMA4B'        | 226 | 2938   | 'GSTA1'    | 426 | 57333  | 'RCN3'     | 626 | 8991  | 'SELENBP1' |
| 27 | 10535     | 'RNASEH2A'      | 227 | 2940   | 'GSTA3'    | 427 | 5737   | 'PTGFR'    | 627 | 89958 | 'SAPCD2'   |
| 28 | 10536     | 'P3H3'          | 228 | 2944   | 'GSTM1'    | 428 | 57405  | 'SPC25'    | 628 | 90293 | 'KLHL13'   |
| 29 | 10551     | 'AGR2'          | 229 | 2949   | 'GSTM5'    | 429 | 5742   | 'PTGS1'    | 629 | 9052  | 'GPCR5A'   |
| 30 | 10561     | 'IFI44'         | 230 | 2954   | 'GSTZ1'    | 430 | 5743   | 'PTGS2'    | 630 | 9055  | 'PRC1'     |
| 31 | 10615     | 'SPAG5'         | 231 | 29923  | 'HILPDA'   | 431 | 5745   | 'PTH1R'    | 631 | 9087  | 'TMSB4Y'   |
| 32 | 1063      | 'CENPF'         | 232 | 29943  | 'PAD11'    | 432 | 57484  | 'RNF150'   | 632 | 9088  | 'PKMYT1'   |
| 33 | 10631     | 'POSTN'         | 233 | 29968  | 'PSAT1'    | 433 | 57565  | 'KLHL14'   | 633 | 91179 | 'SCARF2'   |
| 34 | 10637     | 'LEFY1'         | 234 | 30001  | 'ERO1A'    | 434 | 576    | 'ADGRB2'   | 634 | 9133  | 'CCNB2'    |
| 35 | 10786     | 'SLC17A3'       | 235 | 30008  | 'EFEMP2'   | 435 | 5764   | 'PTN'      | 635 | 91461 | 'PKDCC'    |
| 36 | 10858     | 'CYP46A1'       | 236 | 30011  | 'SH3KBP1'  | 436 | 58     | 'ACTA1'    | 636 | 91522 | 'COL23A1'  |
| 37 | 10875     | 'FGL2'          | 237 | 3081   | 'HGD'      | 437 | 5802   | 'PTPRS'    | 637 | 91683 | 'SYT12'    |
| 38 | 109504726 | 'ERV3-1-ZNF117' | 238 | 3099   | 'HK2'      | 438 | 5806   | 'PTX3'     | 638 | 9170  | 'LPAR2'    |
| 39 | 10964     | 'IFI44L'        | 239 | 3161   | 'HMMR'     | 439 | 5831   | 'PYCRI'    | 639 | 9173  | 'ILIRL1'   |
| 40 | 10974     | 'ADIRF'         | 240 | 3164   | 'NR4A1'    | 440 | 58504  | 'ARHGAP22' | 640 | 9201  | 'DCLK1'    |
| 41 | 11004     | 'KIF2C'         | 241 | 3212   | 'HOXB2'    | 441 | 59269  | 'HIVEP3'   | 641 | 9212  | 'AURKB'    |
| 42 | 11007     | 'CCDC85B'       | 242 | 3215   | 'HOXB5'    | 442 | 59350  | 'RXFP1'    | 642 | 92291 | 'CAPN13'   |
| 43 | 11065     | 'UBE2C'         | 243 | 3218   | 'HOXB8'    | 443 | 595    | 'CCND1'    | 643 | 9232  | 'PTTG1'    |
| 44 | 111       | 'ADCY5'         | 244 | 3234   | 'HOXD8'    | 444 | 5997   | 'RGS2'     | 644 | 9244  | 'CRLF1'    |
| 45 | 11117     | 'EMILIN1'       | 245 | 3280   | 'HES1'     | 445 | 60598  | 'KCNK15'   | 645 | 9249  | 'DHRS3'    |
| 46 | 11135     | 'CCDC42EP1'     | 246 | 3305   | 'HSPA1L'   | 446 | 60676  | 'PAPPA2'   | 646 | 92815 | 'H2AW'     |
| 47 | 11156     | 'PTP4A3'        | 247 | 332    | 'BIRC5'    | 447 | 60681  | 'FKBP10'   | 647 | 9388  | 'LIPG'     |
| 48 | 11167     | 'FSTL1'         | 248 | 333    | 'APLP1'    | 448 | 6142   | 'RPL18A'   | 648 | 94    | 'ACVRL1'   |
| 49 | 11170     | 'FAM107A'       | 249 | 333926 | 'PPM1J'    | 449 | 6206   | 'RPS12'    | 649 | 94033 | 'FTMT'     |
| 50 | 112267859 | 'LOC112267859'  | 250 | 337876 | 'CHSY3'    | 450 | 623    | 'BDKRB1'   | 650 | 94120 | 'SYTL3'    |
| 51 | 112399    | 'EGLN3'         | 251 | 339479 | 'BRINP3'   | 451 | 6241   | 'RRM2'     | 651 | 9415  | 'FADS2'    |
| 52 | 11240     | 'PAD12'         | 252 | 3399   | 'ID3'      | 452 | 6273   | 'S100A2'   | 652 | 9427  | 'ECEL1'    |
| 53 | 11259     | 'FILIP1L'       | 253 | 340547 | 'VSIG1'    | 453 | 6275   | 'S100A4'   | 653 | 9435  | 'CHST2'    |
| 54 | 112694756 | 'LOC112694756'  | 254 | 3426   | 'CFI'      | 454 | 6280   | 'S100A9'   | 654 | 948   | 'CD36'     |
| 55 | 113130    | 'CDCA5'         | 255 | 342667 | 'STAC2'    | 455 | 631    | 'BFSP1'    | 655 | 9493  | 'KIF23'    |
| 56 | 114788    | 'CSMD3'         | 256 | 343069 | 'HNRNPCL1' | 456 | 633    | 'BGN'      | 656 | 9510  | 'ADAMTS1'  |
| 57 | 114794    | 'ELFN2'         | 257 | 347688 | 'TUBB8'    | 457 | 6332   | 'SCN7A'    | 657 | 9514  | 'GAL3ST1'  |
| 58 | 115207    | 'KCTD12'        | 258 | 3485   | 'IGFBP2'   | 458 | 6344   | 'SCTR'     | 658 | 954   | 'ENTPD2'   |
| 59 | 115265    | 'DDIT4L'        | 259 | 3486   | 'IGFBP3'   | 459 | 6347   | 'CCL2'     | 659 | 9590  | 'AKAP12'   |
| 60 | 115290    | 'FBXO17'        | 260 | 3488   | 'IGFBP5'   | 460 | 6382   | 'SDC1'     | 660 | 9607  | 'CARTPT'   |
| 61 | 115677    | 'NOSTRIN'       | 261 | 3489   | 'IGFBP6'   | 461 | 63917  | 'GALNT11'  | 661 | 9636  | 'ISG15'    |
| 62 | 115703    | 'ARHGAP33'      | 262 | 349667 | 'RTN4RL2'  | 462 | 64073  | 'C19orf33' | 662 | 9700  | 'ISPL1'    |
| 63 | 116039    | 'OSR2'          | 263 | 353322 | 'ANKRD37'  | 463 | 64077  | 'LHPP'     | 663 | 9746  | 'CLSTN3'   |
| 64 | 116154    | 'PHACTR3'       | 264 | 3547   | 'IGSF1'    | 464 | 64101  | 'LRRC4'    | 664 | 9768  | 'PCLAF'    |
| 65 | 116372    | 'LYPD1'         | 265 | 3569   | 'IL6'      | 465 | 641455 | 'POTEM'    | 665 | 9787  | 'DLGAP5'   |
| 66 | 116844    | 'LRG1'          | 266 | 3671   | 'ISLR'     | 466 | 64151  | 'NCAPG'    | 666 | 983   | 'CDK1'     |
| 67 | 117581    | 'TWIST2'        | 267 | 3678   | 'ITGA5'    | 467 | 6422   | 'SFRP1'    | 667 | 990   | 'CDC6'     |
| 68 | 118663    | 'BTBD16'        | 268 | 3694   | 'ITGB6'    | 468 | 64236  | 'PDLIM2'   | 668 | 9902  | 'MRC2'     |
| 69 | 1240      | 'CMKLR1'        | 269 | 3708   | 'ITPR1'    | 469 | 6446   | 'SGK1'     | 669 | 991   | 'CDC20'    |
| 70 | 124930    | 'ANKRD13B'      | 270 | 3730   | 'ANOS1'    | 470 | 6447   | 'SCG5'     | 670 | 9982  | 'FGFBP1'   |
| 71 | 125113    | 'KRT222'        | 271 | 3732   | 'CD82'     | 471 | 6469   | 'SHH'      | 671 | 9985  | 'REC8'     |
| 72 | 126129    | 'CPTIC'         | 272 | 374393 | 'FAM111B'  | 472 | 646960 | 'PRSS56'   |     |       |            |

|     |        |           |     |        |            |
|-----|--------|-----------|-----|--------|------------|
| 73  | 151742 | 'PPMIL'   | 273 | 6505   | 'SLC1A1'   |
| 74  | 153222 | 'CREBRF'  | 274 | 651746 | 'ANKRD33B' |
| 75  | 1577   | 'CYP3A5'  | 275 | 6519   | 'SLC3A1'   |
| 76  | 158471 | 'PRUNE2'  | 276 | 65250  | 'CLANE1'   |
| 77  | 1593   | 'CYP27A1' | 277 | 6526   | 'SLC5A3'   |
| 78  | 1604   | 'CD55'    | 278 | 654463 | 'FER1L6'   |
| 79  | 160851 | 'DGKH'    | 279 | 66008  | 'TRAK2'    |
| 80  | 162417 | 'NAGS'    | 280 | 6648   | 'SOD2'     |
| 81  | 1634   | 'DCN'     | 281 | 6755   | 'SSTR5'    |
| 82  | 1646   | 'AKR1C2'  | 282 | 687    | 'KLF9'     |
| 83  | 166824 | 'RASSF6'  | 283 | 6990   | 'DYNLT3'   |
| 84  | 169792 | 'GLIS3'   | 284 | 7035   | 'TFPI'     |
| 85  | 1831   | 'TSC2D23' | 285 | 7049   | 'TGFB3'    |
| 86  | 1852   | 'DUSP9'   | 286 | 7056   | 'THBD'     |
| 87  | 192670 | 'AGO4'    | 287 | 7099   | 'TLR4'     |
| 88  | 1956   | 'EGFR'    | 288 | 710    | 'SERPING1' |
| 89  | 196446 | 'MYRFL'   | 289 | 7145   | 'TNS1'     |
| 90  | 201163 | 'FLCN'    | 290 | 716    | 'C1S'      |
| 91  | 202333 | 'CMYA5'   | 291 | 7188   | 'TRAF5'    |
| 92  | 203523 | 'ZNF449'  | 292 | 7248   | 'TSC1'     |
| 93  | 2065   | 'ERBB3'   | 293 | 728047 | 'GOLGA80'  |
| 94  | 2081   | 'ERN1'    | 294 | 728577 | 'CNTNAP3B' |
| 95  | 2170   | 'FABP3'   | 295 | 728741 | 'NPIP6'    |
| 96  | 2180   | 'ACSL1'   | 296 | 7296   | 'TXNRD1'   |
| 97  | 219736 | 'STOX1'   | 297 | 734    | 'OSGIN2'   |
| 98  | 2202   | 'EFEMP1'  | 298 | 7552   | 'ZNF711'   |
| 99  | 220213 | 'OTUD1'   | 299 | 7704   | 'ZBTB16'   |
| 100 | 220441 | 'RNF152'  | 300 | 7763   | 'ZFAND5'   |
| 101 | 221    | 'ALDH3B1' | 301 | 7780   | 'SLC30A2'  |
| 102 | 221692 | 'PHACTR1' | 302 | 7852   | 'CXCR4'    |
| 103 | 221785 | 'ZSCAN25' | 303 | 79037  | 'PVRIG'    |
| 104 | 221981 | 'THSD7A'  | 304 | 79616  | 'CCNJL'    |
| 105 | 224    | 'ALDH3A2' | 305 | 79794  | 'SPRING1'  |
| 106 | 2263   | 'FGFR2'   | 306 | 79817  | 'MOB3B'    |
| 107 | 2267   | 'FGL1'    | 307 | 79901  | 'CYBRD1'   |
| 108 | 2289   | 'FKBP5'   | 308 | 79937  | 'CNTNAP3'  |
| 109 | 22909  | 'FANI'    | 309 | 80005  | 'DOCK5'    |
| 110 | 22941  | 'SHANK2'  | 310 | 80031  | 'SEMA6D'   |
| 111 | 23052  | 'ENDOD1'  | 311 | 80162  | 'PGGHG'    |
| 112 | 23117  | 'NPIP3'   | 312 | 80176  | 'SPSB1'    |
| 113 | 23133  | 'PHF8'    | 313 | 80262  | 'C16orf70' |
| 114 | 23138  | 'N4BP3'   | 314 | 80325  | 'ABTB1'    |
| 115 | 23175  | 'LPIN1'   | 315 | 80763  | 'SPX'      |
| 116 | 23277  | 'CLUH'    | 316 | 81035  | 'COLEC12'  |
| 117 | 23308  | 'ICOSLG'  | 317 | 81606  | 'LBH'      |
| 118 | 23338  | 'JADE2'   | 318 | 81848  | 'SPRY4'    |
| 119 | 23345  | 'SYNE1'   | 319 | 83937  | 'RASSF4'   |
| 120 | 23371  | 'TNS2'    | 320 | 83992  | 'CTTNBP2'  |
| 121 | 23405  | 'DICER1'  | 321 | 84085  | 'FBXO30'   |
| 122 | 23411  | 'SIRT1'   | 322 | 8411   | 'EEA1'     |

|     |        |             |     |        |                   |     |        |             |  |  |  |
|-----|--------|-------------|-----|--------|-------------------|-----|--------|-------------|--|--|--|
| 73  | 1271   | 'CNTFR'     | 273 | 374569 | 'ASPG'            | 473 | 64699  | 'TMPRSS3'   |  |  |  |
| 74  | 1277   | 'COL1A1'    | 274 | 3758   | 'KCNJ1'           | 474 | 64856  | 'VWA1'      |  |  |  |
| 75  | 1278   | 'COL1A2'    | 275 | 3772   | 'KCNJ15'          | 475 | 64922  | 'LRRRC19'   |  |  |  |
| 76  | 1281   | 'COL3A1'    | 276 | 377677 | 'CA13'            | 476 | 64943  | 'NT5DC2'    |  |  |  |
| 77  | 128178 | 'EDARADD'   | 277 | 3778   | 'KCNMA1'          | 477 | 6495   | 'SIX1'      |  |  |  |
| 78  | 128239 | 'IQGAP3'    | 278 | 3784   | 'KCNQ1'           | 478 | 6508   | 'SLC4A3'    |  |  |  |
| 79  | 1289   | 'COL5A1'    | 279 | 3833   | 'KIFC1'           | 479 | 65108  | 'MARCKSL1'  |  |  |  |
| 80  | 1290   | 'COL5A2'    | 280 | 3855   | 'KRT7'            | 480 | 6513   | 'SLC2A1'    |  |  |  |
| 81  | 1292   | 'COL6A2'    | 281 | 3861   | 'KRT14'           | 481 | 6525   | 'SMTN'      |  |  |  |
| 82  | 1295   | 'COL8A1'    | 282 | 3868   | 'KRT16'           | 482 | 653269 | 'POTE1'     |  |  |  |
| 83  | 1298   | 'COL9A2'    | 283 | 387082 | 'SUMO4'           | 483 | 653319 | 'KIAA0895L' |  |  |  |
| 84  | 130    | 'ADH6'      | 284 | 3872   | 'KRT17'           | 484 | 653598 | 'PPIAL4C'   |  |  |  |
| 85  | 130340 | 'APIS3'     | 285 | 387509 | 'GPR153'          | 485 | 653659 | 'TMEM183B'  |  |  |  |
| 86  | 130497 | 'OSRI'      | 286 | 387695 | 'C10orf99'        | 486 | 654364 | 'NME1-NME2' |  |  |  |
| 87  | 1307   | 'COL16A1'   | 287 | 3880   | 'KRT19'           | 487 | 6546   | 'SLC8A1'    |  |  |  |
| 88  | 131    | 'ADH7'      | 288 | 388135 | 'INSY1'           | 488 | 6557   | 'SLC12A1'   |  |  |  |
| 89  | 133688 | 'UGT3A1'    | 289 | 388610 | 'TRNP1'           | 489 | 6565   | 'SLC15A2'   |  |  |  |
| 90  | 1356   | 'CP'        | 290 | 389332 | 'SMIM32'          | 490 | 6568   | 'SLC17A1'   |  |  |  |
| 91  | 1373   | 'CPS1'      | 291 | 389376 | 'SFTA2'           | 491 | 6608   | 'SMO'       |  |  |  |
| 92  | 138065 | 'RNF183'    | 292 | 389792 | 'IER5L'           | 492 | 6614   | 'SIGLEC1'   |  |  |  |
| 93  | 140465 | 'MYL6B'     | 293 | 390205 | 'LRRRC10B'        | 493 | 6623   | 'SNCG'      |  |  |  |
| 94  | 140801 | 'RPL10L'    | 294 | 3910   | 'LAMA4'           | 494 | 6636   | 'SNRPF'     |  |  |  |
| 95  | 140823 | 'ROMO1'     | 295 | 3915   | 'LAMC1'           | 495 | 6640   | 'SNTA1'     |  |  |  |
| 96  | 1428   | 'CRYM'      | 296 | 3918   | 'LAMC2'           | 496 | 6649   | 'SOD3'      |  |  |  |
| 97  | 143244 | 'EIF5A1L'   | 297 | 392490 | 'FLJ44635'        | 497 | 6662   | 'SOX9'      |  |  |  |
| 98  | 143903 | 'LAYN'      | 298 | 3956   | 'LGALS1'          | 498 | 6676   | 'SPAG4'     |  |  |  |
| 99  | 144501 | 'KRT80'     | 299 | 399473 | 'SPRED3'          | 499 | 6678   | 'SPARC'     |  |  |  |
| 100 | 144983 | 'HNRNPA1L2' | 300 | 4001   | 'LMNB1'           | 500 | 6695   | 'SPOCK1'    |  |  |  |
| 101 | 1466   | 'CSRP2'     | 301 | 401115 | 'C4orf48'         | 501 | 6696   | 'SPP1'      |  |  |  |
| 102 | 146909 | 'KIF18B'    | 302 | 401250 | 'MCCD1'           | 502 | 6751   | 'SSTR1'     |  |  |  |
| 103 | 147111 | 'NOTUM'     | 303 | 4016   | 'LOXL1'           | 503 | 684    | 'BST2'      |  |  |  |
| 104 | 147183 | 'KRT25'     | 304 | 4017   | 'LOXL2'           | 504 | 6909   | 'TBX2'      |  |  |  |
| 105 | 148398 | 'SAMD11'    | 305 | 402778 | 'IFITM10'         | 505 | 6925   | 'TCF4'      |  |  |  |
| 106 | 149461 | 'CLDN19'    | 306 | 4037   | 'LRP3'            | 506 | 6941   | 'TCF19'     |  |  |  |
| 107 | 150372 | 'NFAM1'     | 307 | 4045   | 'LSAMP'           | 507 | 699    | 'BUB1'      |  |  |  |
| 108 | 150468 | 'CKAP2L'    | 308 | 4057   | 'LTF'             | 508 | 70     | 'ACTC1'     |  |  |  |
| 109 | 150696 | 'PROM2'     | 309 | 407977 | 'TNFSF12-TNFSF13' | 509 | 701    | 'BUB1B'     |  |  |  |
| 110 | 151176 | 'ERFE'      | 310 | 4094   | 'MAF'             | 510 | 7025   | 'NR2F1'     |  |  |  |
| 111 | 151354 | 'LRATD1'    | 311 | 4118   | 'MAL'             | 511 | 7031   | 'TFF1'      |  |  |  |
| 112 | 151887 | 'CCDC80'    | 312 | 4133   | 'MAP2'            | 512 | 7032   | 'TFF2'      |  |  |  |
| 113 | 152002 | 'XXYLT1'    | 313 | 4147   | 'MATN2'           | 513 | 7043   | 'TGFB3'     |  |  |  |
| 114 | 152110 | 'NEK10'     | 314 | 4148   | 'MATN3'           | 514 | 7052   | 'TGM2'      |  |  |  |
| 115 | 155006 | 'TMEM213'   | 315 | 4211   | 'MEIS1'           | 515 | 7078   | 'TIMP3'     |  |  |  |
| 116 | 1572   | 'CYP2F1'    | 316 | 4212   | 'MEIS2'           | 516 | 7083   | 'TK1'       |  |  |  |
| 117 | 157869 | 'SBSPON1'   | 317 | 4232   | 'MEST'            | 517 | 7089   | 'TLE2'      |  |  |  |
| 118 | 162466 | 'PHOSPHO1'  | 318 | 4282   | 'MIF'             | 518 | 7102   | 'TSPAN7'    |  |  |  |
| 119 | 163351 | 'GBP6'      | 319 | 4288   | 'MKI67'           | 519 | 7108   | 'TM7SF2'    |  |  |  |
| 120 | 164091 | 'PAQR7'     | 320 | 4313   | 'MMP2'            | 520 | 7114   | 'TMSB4X'    |  |  |  |
| 121 | 165    | 'AEBP1'     | 321 | 440093 | 'H3-5'            | 521 | 7153   | 'TOP2A'     |  |  |  |
| 122 | 165257 | 'C1QL2'     | 322 | 441054 | 'C4orf47'         | 522 | 7167   | 'TPI1'      |  |  |  |

|     |        |            |     |       |            |
|-----|--------|------------|-----|-------|------------|
| 123 | 23446  | 'SLC44A1'  | 323 | 84166 | 'NLRC5'    |
| 124 | 23460  | 'ABCA6'    | 324 | 8417  | 'STX7'     |
| 125 | 23461  | 'ABCA5'    | 325 | 84220 | 'RGPDS'    |
| 126 | 23492  | 'CBX7'     | 326 | 84260 | 'TCHP'     |
| 127 | 23516  | 'SLC39A14' | 327 | 84293 | 'PRXL2A'   |
| 128 | 23530  | 'NNT'      | 328 | 84336 | 'TMEM101'  |
| 129 | 23657  | 'SLC7A11'  | 329 | 84532 | 'ACSS1'    |
| 130 | 253260 | 'RICTOR'   | 330 | 84750 | 'FUT10'    |
| 131 | 254427 | 'PROSER2'  | 331 | 84851 | 'TRIM52'   |
| 132 | 254887 | 'ZDHHC23'  | 332 | 84913 | 'ATOH8'    |
| 133 | 2549   | 'GABI1'    | 333 | 8501  | 'SLC43A1'  |
| 134 | 256764 | 'WDR72'    | 334 | 85027 | 'SMIM3'    |
| 135 | 25825  | 'BACE2'    | 335 | 8515  | 'ITGA10'   |
| 136 | 25992  | 'SNED1'    | 336 | 85379 | 'KIAA1671' |
| 137 | 26     | 'AOC1'     | 337 | 85457 | 'CIPC'     |
| 138 | 26253  | 'CLEC4E'   | 338 | 8578  | 'SCARF1'   |
| 139 | 2634   | 'GBP2'     | 339 | 8609  | 'KLF7'     |
| 140 | 26471  | 'NUPR1'    | 340 | 8660  | 'IRS2'     |
| 141 | 26873  | 'OPLAH'    | 341 | 8722  | 'CTSF'     |
| 142 | 27106  | 'ARRDC2'   | 342 | 8743  | 'TNFSF10'  |
| 143 | 27303  | 'RBMS3'    | 343 | 89932 | 'PAPLN'    |
| 144 | 2752   | 'GLUL'     | 344 | 9001  | 'HAP1'     |
| 145 | 283991 | 'UBALD2'   | 345 | 90427 | 'BMF'      |
| 146 | 284391 | 'ZNF844'   | 346 | 90874 | 'ZNF697'   |
| 147 | 285268 | 'ZNF621'   | 347 | 9108  | 'MTMR7'    |
| 148 | 2878   | 'GPX3'     | 348 | 91156 | 'IGFN1'    |
| 149 | 2887   | 'GRB10'    | 349 | 92017 | 'SNX29'    |
| 150 | 28960  | 'DCPS'     | 350 | 92211 | 'CDHR1'    |
| 151 | 28968  | 'SLC6A16'  | 351 | 9229  | 'DLGAP1'   |
| 152 | 28970  | 'C11orf54' | 352 | 924   | 'CD7'      |
| 153 | 28996  | 'HIPK2'    | 353 | 9476  | 'NAPSA'    |
| 154 | 28999  | 'KLF15'    | 354 | 9481  | 'SLC25A27' |
| 155 | 29121  | 'CLEC2D'   | 355 | 9547  | 'CXCL14'   |
| 156 | 29767  | 'TMOD2'    | 356 | 9619  | 'ABCG1'    |
| 157 | 29799  | 'YPEL1'    | 357 | 96626 | 'LIMS3'    |
| 158 | 29945  | 'ANAPC4'   | 358 | 9674  | 'KIAA0040' |
| 159 | 3162   | 'HMOX1'    | 359 | 9679  | 'FAM53B'   |
| 160 | 3176   | 'HNM1'     | 360 | 9762  | 'LZTS3'    |
| 161 | 32     | 'ACACB'    | 361 | 9771  | 'RAPGEF5'  |
| 162 | 3240   | 'HP'       | 362 | 9829  | 'DNAJC6'   |
| 163 | 3291   | 'HSD11B2'  | 363 | 9846  | 'GAB2'     |
| 164 | 339122 | 'RAB43'    | 364 | 9903  | 'KLHL21'   |
| 165 | 340371 | 'NRBP2'    |     |       |            |
| 166 | 3437   | 'IFIT3'    |     |       |            |
| 167 | 3481   | 'IGF2'     |     |       |            |
| 168 | 3484   | 'IGFBP1'   |     |       |            |
| 169 | 3508   | 'IGHMBP2'  |     |       |            |
| 170 | 352954 | 'CASTOR3'  |     |       |            |
| 171 | 3553   | 'IL1B'     |     |       |            |
| 172 | 3554   | 'IL1R1'    |     |       |            |

|     |        |           |     |        |             |     |        |            |  |  |  |
|-----|--------|-----------|-----|--------|-------------|-----|--------|------------|--|--|--|
| 123 | 166614 | 'DCLK2'   | 323 | 4490   | 'MT1B'      | 523 | 7169   | 'TPM2'     |  |  |  |
| 124 | 167410 | 'LIX1'    | 324 | 4499   | 'MT1M'      | 524 | 72     | 'ACTG2'    |  |  |  |
| 125 | 167681 | 'PRSS35'  | 325 | 4599   | 'MX1'       | 525 | 7216   | 'TRO'      |  |  |  |
| 126 | 168002 | 'DACT2'   | 326 | 4605   | 'MYBL2'     | 526 | 7262   | 'PHLDA2'   |  |  |  |
| 127 | 171177 | 'RHOV'    | 327 | 4648   | 'MYO7B'     | 527 | 7272   | 'TTK'      |  |  |  |
| 128 | 1742   | 'DLG4'    | 328 | 4684   | 'NCAM1'     | 528 | 7277   | 'TUBA4A'   |  |  |  |
| 129 | 1757   | 'SARDH'   | 329 | 4784   | 'NFX1'      | 529 | 727897 | 'MUC5B'    |  |  |  |
| 130 | 1839   | 'HBEGF'   | 330 | 4830   | 'NME1'      | 530 | 728378 | 'POTEF'    |  |  |  |
| 131 | 1848   | 'DUSP6'   | 331 | 4833   | 'NME4'      | 531 | 7291   | 'TWIST1'   |  |  |  |
| 132 | 1869   | 'E2F1'    | 332 | 4856   | 'CCN3'      | 532 | 7298   | 'TYMS'     |  |  |  |
| 133 | 1879   | 'EBF1'    | 333 | 4860   | 'PNP'       | 533 | 7314   | 'UBB'      |  |  |  |
| 134 | 1947   | 'EFNB1'   | 334 | 4880   | 'NPPC'      | 534 | 7348   | 'UPK1B'    |  |  |  |
| 135 | 202151 | 'RANBP3L' | 335 | 4900   | 'NRGN'      | 535 | 7351   | 'UCP2'     |  |  |  |
| 136 | 2022   | 'ENG'     | 336 | 493869 | 'GPX8'      | 536 | 7412   | 'VCAM1'    |  |  |  |
| 137 | 2023   | 'ENO1'    | 337 | 4969   | 'OGN'       | 537 | 7422   | 'VEGFA'    |  |  |  |
| 138 | 2041   | 'EPHA1'   | 338 | 5025   | 'P2RX4'     | 538 | 7425   | 'VGF'      |  |  |  |
| 139 | 2043   | 'EPHA4'   | 339 | 5031   | 'P2RY6'     | 539 | 7431   | 'VIM'      |  |  |  |
| 140 | 2047   | 'EPHB1'   | 340 | 5042   | 'PABPC3'    | 540 | 7436   | 'VLDLR'    |  |  |  |
| 141 | 2049   | 'EPHB3'   | 341 | 50617  | 'ATP6V0A4'  | 541 | 7476   | 'WNT7A'    |  |  |  |
| 142 | 2066   | 'ERBB4'   | 342 | 50805  | 'IRX4'      | 542 | 7477   | 'WNT7B'    |  |  |  |
| 143 | 2146   | 'EZH2'    | 343 | 50861  | 'STMN3'     | 543 | 7498   | 'XDH'      |  |  |  |
| 144 | 2182   | 'ACSL4'   | 344 | 5091   | 'PC'        | 544 | 762    | 'CA4'      |  |  |  |
| 145 | 2191   | 'FAP'     | 345 | 5104   | 'SERPINA5'  | 545 | 768    | 'CA9'      |  |  |  |
| 146 | 2199   | 'FBLN2'   | 346 | 5105   | 'PCK1'      | 546 | 771    | 'CA12'     |  |  |  |
| 147 | 221527 | 'ZBTB12'  | 347 | 51087  | 'YBX2'      | 547 | 7846   | 'TUBA1A'   |  |  |  |
| 148 | 2219   | 'FCN1'    | 348 | 51129  | 'ANGPTL4'   | 548 | 7850   | 'IL1R2'    |  |  |  |
| 149 | 222962 | 'SLC29A4' | 349 | 51162  | 'EGFL7'     | 549 | 7851   | 'MALL'     |  |  |  |
| 150 | 2256   | 'FGF11'   | 350 | 5118   | 'PCOLCE'    | 550 | 7857   | 'SCG2'     |  |  |  |
| 151 | 226    | 'ALDOA'   | 351 | 51200  | 'CPA4'      | 551 | 7867   | 'MAPKAPK3' |  |  |  |
| 152 | 2261   | 'FGFR3'   | 352 | 51226  | 'COPZ2'     | 552 | 79019  | 'CENPM'    |  |  |  |
| 153 | 2264   | 'FGFR4'   | 353 | 5125   | 'PCSK5'     | 553 | 79154  | 'DHRS11'   |  |  |  |
| 154 | 2274   | 'FHL2'    | 354 | 5129   | 'CDK18'     | 554 | 79366  | 'HMGNS5'   |  |  |  |
| 155 | 229    | 'ALDOB'   | 355 | 51303  | 'FKBP11'    | 555 | 79411  | 'GLB1L'    |  |  |  |
| 156 | 2290   | 'FOXG1'   | 356 | 51310  | 'SLC22A17'  | 556 | 79413  | 'ZBED2'    |  |  |  |
| 157 | 22943  | 'DKK1'    | 357 | 51330  | 'TNFRSF12A' | 557 | 79589  | 'RNF128'   |  |  |  |
| 158 | 22974  | 'TPX2'    | 358 | 51364  | 'ZMYND10'   | 558 | 79679  | 'VTCN1'    |  |  |  |
| 159 | 22998  | 'LIMCH1'  | 359 | 51450  | 'PRRX2'     | 559 | 79729  | 'SH3D21'   |  |  |  |
| 160 | 230    | 'ALDOC'   | 360 | 51473  | 'DCDC2'     | 560 | 79733  | 'E2F8'     |  |  |  |
| 161 | 23024  | 'PDZRN3'  | 361 | 51512  | 'GTSE1'     | 561 | 79801  | 'SHCBP1'   |  |  |  |
| 162 | 2304   | 'FOXE1'   | 362 | 51514  | 'DTL'       | 562 | 79850  | 'TLCD3A'   |  |  |  |
| 163 | 2305   | 'FOXM1'   | 363 | 5159   | 'PDGFRB'    | 563 | 79899  | 'PRR5L'    |  |  |  |
| 164 | 23129  | 'PLXND1'  | 364 | 51614  | 'ERGIC3'    | 564 | 79935  | 'CCNP'     |  |  |  |
| 165 | 2318   | 'FLNC'    | 365 | 5163   | 'PDK1'      | 565 | 80115  | 'BAIAP2L2' |  |  |  |
| 166 | 23397  | 'NCAPH'   | 366 | 51661  | 'FKBP7'     | 566 | 80144  | 'FRAS1'    |  |  |  |
| 167 | 23414  | 'ZFPM2'   | 367 | 5168   | 'ENPP2'     | 567 | 80164  | 'PRR36'    |  |  |  |
| 168 | 2348   | 'FOLR1'   | 368 | 5176   | 'SERPINF1'  | 568 | 80326  | 'WNT10A'   |  |  |  |
| 169 | 2353   | 'FOS'     | 369 | 5209   | 'PKFNB3'    | 569 | 80349  | 'WDR61'    |  |  |  |
| 170 | 2354   | 'FOSB'    | 370 | 5210   | 'PKFNB4'    | 570 | 80727  | 'TTYH3'    |  |  |  |
| 171 | 23600  | 'AMACR'   | 371 | 5223   | 'PGAM1'     | 571 | 80758  | 'PRR7'     |  |  |  |
| 172 | 23616  | 'SH3BP1'  | 372 | 5230   | 'PGK1'      | 572 | 81557  | 'MAGED4B'  |  |  |  |

|     |        |            |  |  |  |
|-----|--------|------------|--|--|--|
| 173 | 3570   | 'IL6R'     |  |  |  |
| 174 | 3572   | 'IL6ST'    |  |  |  |
| 175 | 360    | 'AQP3'     |  |  |  |
| 176 | 3643   | 'INSR'     |  |  |  |
| 177 | 3656   | 'IRAK2'    |  |  |  |
| 178 | 3667   | 'TRIS1'    |  |  |  |
| 179 | 3707   | 'ITPKB'    |  |  |  |
| 180 | 3748   | 'KCNC3'    |  |  |  |
| 181 | 375057 | 'STUM'     |  |  |  |
| 182 | 375775 | 'PNPLA7'   |  |  |  |
| 183 | 384    | 'ARG2'     |  |  |  |
| 184 | 387680 | 'WASHC2A'  |  |  |  |
| 185 | 387700 | 'SLC16A12' |  |  |  |
| 186 | 387758 | 'FIBIN'    |  |  |  |
| 187 | 387914 | 'SHISA2'   |  |  |  |
| 188 | 388403 | 'YPEL2'    |  |  |  |
| 189 | 389072 | 'PLEKHM3'  |  |  |  |
| 190 | 389432 | 'SAMD5'    |  |  |  |
| 191 | 389434 | 'TYD'      |  |  |  |
| 192 | 390077 | 'OR52N2'   |  |  |  |
| 193 | 3987   | 'LIMS1'    |  |  |  |
| 194 | 4121   | 'MAN1A1'   |  |  |  |
| 195 | 4131   | 'MAP1B'    |  |  |  |
| 196 | 415    | 'ARSL'     |  |  |  |
| 197 | 4217   | 'MAP3K5'   |  |  |  |
| 198 | 4254   | 'KITLG'    |  |  |  |
| 199 | 4301   | 'AFDN'     |  |  |  |
| 200 | 4318   | 'MMP9'     |  |  |  |

|     |        |            |     |       |            |     |       |            |  |  |  |
|-----|--------|------------|-----|-------|------------|-----|-------|------------|--|--|--|
| 173 | 23705  | 'CADM1'    | 373 | 5265  | 'SERPINA1' | 573 | 81618 | 'ITM2C'    |  |  |  |
| 174 | 24     | 'ABCA4'    | 374 | 5284  | 'PIGR'     | 574 | 81620 | 'CDT1'     |  |  |  |
| 175 | 24137  | 'KIF4A'    | 375 | 5321  | 'PLA2G4A'  | 575 | 827   | 'CAPN6'    |  |  |  |
| 176 | 24147  | 'FJX1'     | 376 | 5332  | 'PLCB4'    | 576 | 8291  | 'DYSF'     |  |  |  |
| 177 | 245812 | 'CNPY4'    | 377 | 5347  | 'PLK1'     | 577 | 8309  | 'ACOX2'    |  |  |  |
| 178 | 249    | 'ALPL'     | 378 | 5351  | 'PLOC1'    | 578 | 8318  | 'CDC45'    |  |  |  |
| 179 | 2533   | 'FYB1'     | 379 | 5360  | 'PLTP'     | 579 | 8324  | 'FZD7'     |  |  |  |
| 180 | 2535   | 'FZD2'     | 380 | 5376  | 'PMP22'    | 580 | 8329  | 'H2AC13'   |  |  |  |
| 181 | 2537   | 'IFI6'     | 381 | 53827 | 'FXD5'     | 581 | 8341  | 'H2BC15'   |  |  |  |
| 182 | 254827 | 'NAALADL2' | 382 | 5396  | 'PRRX1'    | 582 | 83439 | 'TCF7L1'   |  |  |  |
| 183 | 254863 | 'TMEM256'  | 383 | 54039 | 'PCBP3'    | 583 | 8344  | 'H2BC6'    |  |  |  |
| 184 | 2556   | 'GABRA3'   | 384 | 5413  | 'SEPTIN5'  | 584 | 8355  | 'H3C8'     |  |  |  |
| 185 | 256714 | 'MAP7D2'   | 385 | 54437 | 'SEMA5B'   | 585 | 83648 | 'FAM167A'  |  |  |  |
| 186 | 25837  | 'RAB26'    | 386 | 54443 | 'ANLN'     | 586 | 83715 | 'ESPN'     |  |  |  |
| 187 | 2584   | 'GALK1'    | 387 | 54541 | 'DDIT4'    | 587 | 8382  | 'NME5'     |  |  |  |
| 188 | 25890  | 'ABI3BP'   | 388 | 54843 | 'SYTL2'    | 588 | 83872 | 'HMCN1'    |  |  |  |
| 189 | 25911  | 'DPCD'     | 389 | 54848 | 'ARHGEF38' | 589 | 83982 | 'IFI27L2'  |  |  |  |
| 190 | 25928  | 'SOSTDC1'  | 390 | 54857 | 'GDPD2'    | 590 | 84058 | 'WDR54'    |  |  |  |
| 191 | 259307 | 'IL4I1'    | 391 | 54976 | 'C20orf27' | 591 | 84152 | 'PPP1R1B'  |  |  |  |
| 192 | 2597   | 'GAPDH'    | 392 | 54997 | 'TESC'     | 592 | 8424  | 'BBOX1'    |  |  |  |
| 193 | 26002  | 'MOXD1'    | 393 | 55061 | 'SUSD4'    | 593 | 84296 | 'GINS4'    |  |  |  |
| 194 | 26085  | 'KLK13'    | 394 | 5507  | 'PPP1R3C'  | 594 | 84300 | 'UQC2'     |  |  |  |
| 195 | 26207  | 'PITPNC1'  | 395 | 55165 | 'CEP55'    | 595 | 8436  | 'CAVIN2'   |  |  |  |
| 196 | 26227  | 'PHGDH'    | 396 | 55195 | 'CCDC198'  | 596 | 8437  | 'RASAL1'   |  |  |  |
| 197 | 26292  | 'MYCBP'    | 397 | 5524  | 'PTPA'     | 597 | 84465 | 'MEGF11'   |  |  |  |
| 198 | 26353  | 'HSPB8'    | 398 | 55304 | 'SPTLC3'   | 598 | 8447  | 'DOC2B'    |  |  |  |
| 199 | 26521  | 'TIMM8B'   | 399 | 55329 | 'MNS1'     | 599 | 84557 | 'MAP1LC3A' |  |  |  |
| 200 | 26579  | 'MYEOV'    | 400 | 55351 | 'STK32B'   | 600 | 84570 | 'COL25A1'  |  |  |  |
