# Supplementary material for: Phenotypical screening on metastatic PRCC-TFE3 fusion translocation renal cell carcinoma organoids reveals potential therapeutic agents
Source: Springer Nature journal article supplement (doi:10.1007/s12094-021-02774-8), 2022-02-03
Supplement: MOESM5 [file 20097814]

Supplementary Data 4. The list of 232 autophagy-related genes

| No | Gene ID | Gene Name                                                                          | Symbol  | No  | Gene ID | Gene Name                                                                                                      | Symbol    | No  | Gene ID | Gene Name                                                                                  | Symbol   |
|----|---------|------------------------------------------------------------------------------------|---------|-----|---------|----------------------------------------------------------------------------------------------------------------|-----------|-----|---------|--------------------------------------------------------------------------------------------|----------|
| 1  | 55626   | autophagy/beclin-1 regulator 1                                                     | AMBRA1  | 81  | 1981    | eukaryotic translation initiation factor 4 gamma, 1                                                            | EIF4G1    | 161 | 3084    | neuregulin 1                                                                               | NRG1     |
| 2  | 8542    | apolipoprotein L, 1                                                                | APOL1   | 82  | 2064    | v-erb-b2 erythroblastic leukemia viral oncogene homolog 2, neuro/glioblastoma derived oncogene homolog (avian) | ERBB2     | 162 | 9542    | neuregulin 2                                                                               | NRG2     |
| 3  | 405     | aryl hydrocarbon receptor nuclear translocator                                     | ARNT    | 83  | 2081    | endoplasmic reticulum to nucleus signaling 1                                                                   | ERN1      | 163 | 10718   | neuregulin 3                                                                               | NRG3     |
| 4  | 410     | arylsulfatase A                                                                    | ARSA    | 84  | 30001   | ERO1-like (S. cerevisiae)                                                                                      | ERO1L     | 164 | 5034    | prolyl 4-hydroxylase, beta polypeptide                                                     | P4HB     |
| 5  | 411     | arylsulfatase B                                                                    | ARSB    | 85  | 8772    | Fas (TNFRSF6)-associated via death domain                                                                      | FADD      | 165 | 5071    | Parkinson disease (autosomal recessive, juvenile) 2, parkin                                | PARK2    |
| 6  | 468     | activating transcription factor 4 (tax-responsive enhancer element B67)            | ATF4    | 86  | 55578   | family with sequence similarity 48, member A                                                                   | FAM48A    | 166 | 142     | poly (ADP-ribose) polymerase 1                                                             | PARP1    |
| 7  | 22926   | activating transcription factor 6                                                  | ATF6    | 87  | 355     | Fas (TNF receptor superfamily, member 6)                                                                       | FAS       | 167 | 8682    | phosphoprotein enriched in astrocytes 15                                                   | PEA15    |
| 8  | 83734   | ATG10 autophagy related 10 homolog (S. cerevisiae)                                 | ATG10   | 88  | 2280    | FK506 binding protein 1A, 12kDa                                                                                | FKBP1A    | 168 | 27043   | proline, glutamate and leucine rich protein 1                                              | PELP1    |
| 9  | 9140    | ATG12 autophagy related 12 homolog (S. cerevisiae)                                 | ATG12   | 89  | 2281    | FK506 binding protein 1B, 12.6 kDa                                                                             | FKBP1B    | 169 | 5195    | peroxisomal biogenesis factor 14                                                           | PEX14    |
| 10 | 55054   | ATG16 autophagy related 16-like 1 (S. cerevisiae)                                  | ATG16L1 | 90  | 2353    | FBJ murine osteosarcoma viral oncogene homolog                                                                 | FOS       | 170 | 8504    | peroxisomal biogenesis factor 3                                                            | PEX3     |
| 11 | 89849   | ATG16 autophagy related 16-like 2 (S. cerevisiae)                                  | ATG16L2 | 91  | 2308    | forkhead box O1                                                                                                | FOXO1     | 171 | 5289    | phosphoinositide-3-kinase, class 3                                                         | PIK3C3   |
| 12 | 23130   | ATG2 autophagy related 2 homolog A (S. cerevisiae)                                 | ATG2A   | 92  | 2309    | forkhead box O3                                                                                                | FOXO3     | 172 | 30849   | phosphoinositide-3-kinase, regulatory subunit 4                                            | PIK3R4   |
| 13 | 55102   | ATG2 autophagy related 2 homolog B (S. cerevisiae)                                 | ATG2B   | 93  | 2548    | glucosidase, alpha; acid                                                                                       | GAA       | 173 | 65018   | PTEN induced putative kinase 1                                                             | PINK1    |
| 14 | 64422   | ATG3 autophagy related 3 homolog (S. cerevisiae)                                   | ATG3    | 94  | 11337   | GABA(A) receptor-associated protein                                                                            | GABARAP   | 174 | 23645   | protein phosphatase 1, regulatory (inhibitor) subunit 15A                                  | PPP1R15A |
| 15 | 115201  | ATG4 autophagy related 4 homolog A (S. cerevisiae)                                 | ATG4A   | 95  | 23710   | GABA(A) receptor-associated protein like 1                                                                     | GABARAPL1 | 175 | 5564    | protein kinase, AMP-activated, beta 1 non-catalytic subunit                                | PRKAB1   |
| 16 | 23192   | ATG4 autophagy related 4 homolog B (S. cerevisiae)                                 | ATG4B   | 96  | 11345   | GABA(A) receptor-associated protein-like 2                                                                     | GABARAPL2 | 176 | 5573    | protein kinase, cAMP-dependent, regulatory, type I, alpha (tissue specific extinguisher 1) | PRKAR1A  |
| 17 | 84938   | ATG4 autophagy related 4 homolog C (S. cerevisiae)                                 | ATG4C   | 97  | 2597    | glyceraldehyde-3-phosphate dehydrogenase                                                                       | GAPDH     | 177 | 5580    | protein kinase C, delta                                                                    | PRKCD    |
| 18 | 84971   | ATG4 autophagy related 4 homolog D (S. cerevisiae)                                 | ATG4D   | 98  | 2773    | guanine nucleotide binding protein (G protein), alpha inhibiting activity polypeptide 3                        | GNAI3     | 178 | 5588    | protein kinase C, theta                                                                    | PRKCQ    |
| 19 | 9474    | ATG5 autophagy related 5 homolog (S. cerevisiae)                                   | ATG5    | 99  | 10399   | guanine nucleotide binding protein (G protein), beta polypeptide 2-like 1                                      | GNB2L1    | 179 | 5728    | phosphatase and tensin homolog                                                             | PTEN     |
| 20 | 10533   | ATG7 autophagy related 7 homolog (S. cerevisiae)                                   | ATG7    | 100 | 57120   | golgi-associated PDZ and coiled-coil motif containing                                                          | GOPC      | 180 | 5753    | PTK6 protein tyrosine kinase 6                                                             | PTK6     |
| 21 | 79065   | ATG9 autophagy related 9 homolog A (S. cerevisiae)                                 | ATG9A   | 101 | 2894    | glutamate receptor, ionotropic, delta 1                                                                        | GRID1     | 181 | 8766    | RAB11A, member RAS oncogene family                                                         | RAB11A   |
| 22 | 285973  | ATG9 autophagy related 9 homolog B (S. cerevisiae)                                 | ATG9B   | 102 | 2895    | glutamate receptor, ionotropic, delta 2                                                                        | GRID2     | 182 | 5861    | RAB1A, member RAS oncogene family                                                          | RAB1A    |
| 23 | 471     | 5-aminoimidazole-4-carboxamide ribonucleotide formyltransferase/IMP cyclohydrolase | ATIC    | 103 | 3065    | histone deacetylase 1                                                                                          | HDAC1     | 183 | 53917   | RAB24, member RAS oncogene family                                                          | RAB24    |
| 24 | 573     | BCL2-associated athanogene                                                         | BAG1    | 104 | 10013   | histone deacetylase 6                                                                                          | HDAC6     | 184 | 83452   | RAB33B, member RAS oncogene family                                                         | RAB33B   |
| 25 | 9531    | BCL2-associated athanogene 3                                                       | BAG3    | 105 | 9146    | hepatocyte growth factor-regulated tyrosine kinase substrate                                                   | HGS       | 185 | 5868    | RAB5A, member RAS oncogene family                                                          | RAB5A    |

|    |        |                                                                                   |          |     |        |                                                                                              |           |     |        |                                                                                         |          |
|----|--------|-----------------------------------------------------------------------------------|----------|-----|--------|----------------------------------------------------------------------------------------------|-----------|-----|--------|-----------------------------------------------------------------------------------------|----------|
| 26 | 578    | BCL2-antagonist/killer 1                                                          | BAK1     | 106 | 3091   | hypoxia inducible factor 1, alpha subunit (basic helix-loop-helix transcription factor)      | HIF1A     | 186 | 7879   | RAB7A, member RAS oncogene family                                                       | RAB7A    |
| 27 | 581    | BCL2-associated X protein                                                         | BAX      | 107 | 3326   | heat shock protein 90kDa alpha (cytosolic), class B member 1                                 | HSP90AB1  | 187 | 5879   | ras-related C3 botulinum toxin substrate 1 (rho family, small GTP binding protein Rac1) | RAC1     |
| 28 | 596    | B-cell CLL/lymphoma 2                                                             | BCL2     | 108 | 3309   | heat shock 70kDa protein 5 (glucose-regulated protein, 78kDa)                                | HSPA5     | 188 | 5894   | v-raf-1 murine leukemia viral oncogene homolog 1                                        | RAF1     |
| 29 | 598    | BCL2-like 1                                                                       | BCL2L1   | 109 | 3312   | heat shock 70kDa protein 8                                                                   | HSPA8     | 189 | 5925   | retinoblastoma 1                                                                        | RB1      |
| 30 | 8678   | beclin 1, autophagy related                                                       | BECN1    | 110 | 26353  | heat shock 22kDa protein 8                                                                   | HSPB8     | 190 | 9821   | RB1-inducible coiled-coil 1                                                             | RB1CC1   |
| 31 | 637    | BH3 interacting domain death agonist                                              | BID      | 111 | 3458   | interferon, gamma                                                                            | IFNG      | 191 | 5970   | v-rel reticuloendotheliosis viral oncogene homolog A (avian)                            | RELA     |
| 32 | 332    | baculoviral IAP repeat-containing 5                                               | BIRC5    | 112 | 3551   | inhibitor of kappa light polypeptide gene enhancer in B-cells, kinase beta                   | IKBKB     | 192 | 10287  | regulator of G-protein signaling 19                                                     | RGS19    |
| 33 | 57448  | baculoviral IAP repeat-containing 6                                               | BIRC6    | 113 | 9641   | inhibitor of kappa light polypeptide gene enhancer in B-cells, kinase epsilon                | IKBKE     | 193 | 6009   | Ras homolog enriched in brain                                                           | RHEB     |
| 34 | 662    | BCL2/adenovirus E1B 19kDa interacting protein 1                                   | BNIP1    | 114 | 11009  | interleukin 24                                                                               | IL24      | 194 | 6198   | ribosomal protein S6 kinase, 70kDa, polypeptide 1                                       | RPS6KB1  |
| 35 | 664    | BCL2/adenovirus E1B 19kDa interacting protein 3                                   | BNIP3    | 115 | 345611 | immunity-related GTPase family, M                                                            | IRGM      | 195 | 57521  | regulatory associated protein of MTOR, complex 1                                        | RPTOR    |
| 36 | 665    | BCL2/adenovirus E1B 19kDa interacting protein 3-like                              | BNIP3L   | 116 | 3675   | integrin, alpha 3 (antigen CD49C, alpha 3 subunit of VLA-3 receptor)                         | ITGA3     | 196 | 56681  | SAR1 homolog A (S. cerevisiae)                                                          | SAR1A    |
| 37 | 60673  | chromosome 12 open reading frame 44                                               | C12orf44 | 117 | 3655   | integrin, alpha 6                                                                            | ITGA6     | 197 | 5265   | serpin peptidase inhibitor, clade A (alpha-1 antitrypsin, antitrypsin), member 1        | SERPINA1 |
| 38 | 23591  | chromosome 17 open reading frame 88                                               | C17orf88 | 118 | 3688   | integrin, beta 1 (fibronectin receptor, beta polypeptide, antigen CD29 includes MDF2, MSK12) | ITGB1     | 198 | 83667  | sestrin 2                                                                               | SESN2    |
| 39 | 10241  | calcium binding and coiled-coil domain 2                                          | CALCOCO2 | 119 | 3691   | integrin, beta 4                                                                             | ITGB4     | 199 | 51100  | SH3-domain GRB2-like endophilin B1                                                      | SH3GLB1  |
| 40 | 10645  | calcium/calmodulin-dependent protein kinase kinase 2, beta                        | CAMKK2   | 120 | 3708   | inositol 1,4,5-triphosphate receptor, type 1                                                 | ITPR1     | 200 | 23411  | sirtuin (silent mating type information regulation 2 homolog) 1 (S. cerevisiae)         | SIRT1    |
| 41 | 821    | calnexin                                                                          | CANX     | 121 | 2548   | glucosidase, alpha; acid                                                                     | GAA       | 201 | 22933  | sirtuin (silent mating type information regulation 2 homolog) 2 (S. cerevisiae)         | SIRT2    |
| 42 | 823    | calpain 1, (mu/I) large subunit                                                   | CAPN1    | 122 | 11337  | GABA(A) receptor-associated protein                                                          | GABARAP   | 202 | 8877   | sphingosine kinase 1                                                                    | SPHK1    |
| 43 | 11132  | calpain 10                                                                        | CAPN10   | 123 | 23710  | GABA(A) receptor-associated protein like 1                                                   | GABARAPL1 | 203 | 83985  | spinster homolog 1 (Drosophila)                                                         | SPNS1    |
| 44 | 824    | calpain 2, (m/II) large subunit                                                   | CAPN2    | 124 | 11345  | GABA(A) receptor-associated protein-like 2                                                   | GABARAPL2 | 204 | 8878   | sequestosome 1                                                                          | SQSTM1   |
| 45 | 826    | calpain, small subunit 1                                                          | CAPNS1   | 125 | 2597   | glyceraldehyde-3-phosphate dehydrogenase                                                     | GAPDH     | 205 | 6767   | suppression of tumorigenicity 13 (colon carcinoma) (Hsp70 interacting protein)          | ST13     |
| 46 | 834    | caspase 1, apoptosis-related cysteine peptidase (interleukin 1, beta, convertase) | CASP1    | 126 | 2773   | guanine nucleotide binding protein (G protein), alpha inhibiting activity polypeptide 3      | GNAI3     | 206 | 6794   | serine/threonine kinase 11                                                              | STK11    |
| 47 | 836    | caspase 3, apoptosis-related cysteine peptidase                                   | CASP3    | 127 | 10399  | guanine nucleotide binding protein (G protein), beta polypeptide 2-like 1                    | GNB2L1    | 207 | 29110  | TANK-binding kinase 1                                                                   | TBK1     |
| 48 | 837    | caspase 4, apoptosis-related cysteine peptidase                                   | CASP4    | 128 | 57120  | golgi-associated PDZ and coiled-coil motif containing                                        | GOPC      | 208 | 10548  | transmembrane 9 superfamily member 1                                                    | TM9SF1   |
| 49 | 841    | caspase 8, apoptosis-related cysteine peptidase                                   | CASP8    | 129 | 2894   | glutamate receptor, ionotropic, delta 1                                                      | GRID1     | 209 | 81671  | transmembrane protein 49                                                                | TMEM49   |
| 50 | 6347   | chemokine (C-C motif) ligand 2                                                    | CCL2     | 130 | 2895   | glutamate receptor, ionotropic, delta 2                                                      | GRID2     | 210 | 157753 | transmembrane protein 74                                                                | TMEM74   |
| 51 | 729230 | chemokine (C-C motif) receptor 2                                                  | CCR2     | 131 | 9711   | KIAA0226                                                                                     | KIAA0226  | 211 | 8743   | tumor necrosis factor (ligand) superfamily, member 10                                   | TNFSF10  |
| 52 | 4179   | CD46 molecule, complement regulatory protein                                      | CD46     | 132 | 9776   | KIAA0652                                                                                     | KIAA0652  | 212 | 7157   | tumor protein p53                                                                       | TP53     |

|    |        |                                                                                                    |          |     |        |                                                                      |          |     |        |                                                     |          |
|----|--------|----------------------------------------------------------------------------------------------------|----------|-----|--------|----------------------------------------------------------------------|----------|-----|--------|-----------------------------------------------------|----------|
| 53 | 1026   | cyclin-dependent kinase inhibitor 1A (p21, Cip1)                                                   | CDKN1A   | 133 | 22863  | KIAA0831                                                             | KIAA0831 | 213 | 58476  | tumor protein p53 inducible nuclear protein 2       | TP53INP2 |
| 54 | 1027   | cyclin-dependent kinase inhibitor 1B (p27, Kip1)                                                   | CDKN1B   | 134 | 3799   | kinesin family member 5B                                             | KIF5B    | 214 | 8626   | tumor protein p63                                   | TP63     |
| 55 | 1029   | cyclin-dependent kinase inhibitor 2A (melanoma, p16, inhibits CDK4)                                | CDKN2A   | 135 | 54800  | kelch-like 24 (Drosophila)                                           | KLHL24   | 215 | 7161   | tumor protein p73                                   | TP73     |
| 56 | 8837   | CASP8 and FADD-like apoptosis regulator                                                            | CFLAR    | 136 | 3916   | lysosomal-associated membrane protein 1                              | LAMP1    | 216 | 7248   | tuberous sclerosis 1                                | TSC1     |
| 57 | 25978  | chromatin modifying protein 2B                                                                     | CHMP2B   | 137 | 3920   | lysosomal-associated membrane protein 2                              | LAMP2    | 217 | 7249   | tuberous sclerosis 2                                | TSC2     |
| 58 | 128866 | chromatin modifying protein 4B                                                                     | CHMP4B   | 138 | 84557  | microtubule-associated protein 1 light chain 3 alpha                 | MAP1LC3A | 218 | 286319 | tumor suppressor candidate 1                        | TUSC1    |
| 59 | 1201   | ceroid-lipofuscinosis, neuronal 3                                                                  | CLN3     | 139 | 81631  | microtubule-associated protein 1 light chain 3 beta                  | MAP1LC3B | 219 | 8408   | unc-51-like kinase 1 (C. elegans)                   | ULK1     |
| 60 | 1508   | cathepsin B                                                                                        | CTSB     | 140 | 440738 | microtubule-associated protein 1 light chain 3 gamma                 | MAP1LC3C | 220 | 9706   | unc-51-like kinase 2 (C. elegans)                   | ULK2     |
| 61 | 1509   | cathepsin D                                                                                        | CTSD     | 141 | 5609   | mitogen-activated protein kinase kinase 7                            | MAP2K7   | 221 | 25989  | unc-51-like kinase 3 (C. elegans)                   | ULK3     |
| 62 | 1514   | cathepsin L1                                                                                       | CTSL1    | 142 | 5594   | mitogen-activated protein kinase 1                                   | MAPK1    | 222 | 9100   | ubiquitin specific peptidase 10                     | USP10    |
| 63 | 6376   | chemokine (C-X3-C motif) ligand 1                                                                  | CX3CL1   | 143 | 5595   | mitogen-activated protein kinase 3                                   | MAPK3    | 223 | 7405   | UV radiation resistance associated gene             | UVRAG    |
| 64 | 7852   | chemokine (C-X-C motif) receptor 4                                                                 | CXCR4    | 144 | 5599   | mitogen-activated protein kinase 8                                   | MAPK8    | 224 | 9341   | vesicle-associated membrane protein 3 (cellubrevin) | VAMP3    |
| 65 | 1612   | death-associated protein kinase 1                                                                  | DAPK1    | 145 | 9479   | mitogen-activated protein kinase 8 interacting protein 1             | MAPK8IP1 | 225 | 6845   | vesicle-associated membrane protein 7               | VAMP7    |
| 66 | 23604  | death-associated protein kinase 2                                                                  | DAPK2    | 146 | 5601   | mitogen-activated protein kinase 9                                   | MAPK9    | 226 | 7422   | vascular endothelial growth factor A                | VEGFA    |
| 67 | 1649   | DNA-damage-inducible transcript 3                                                                  | DDIT3    | 147 | 51360  | membrane-bound transcription factor peptidase, site 2                | MBTPS2   | 227 | 23001  | WD repeat and FYVE domain containing 3              | WDFY3    |
| 68 | 9077   | DIRAS family, GTP-binding RAS-like 3                                                               | DIRAS3   | 148 | 64223  | MTOR associated protein, LST8 homolog (S. cerevisiae)                | MLST8    | 228 | 11152  | WD repeat domain 45                                 | WDR45    |
| 69 | 10395  | deleted in liver cancer 1                                                                          | DLC1     | 149 | 64419  | myotubularin related protein 14                                      | MTMR14   | 229 | 56270  | WDR45-like                                          | WDR45L   |
| 70 | 3337   | DnaJ (Hsp40) homolog, subfamily B, member 1                                                        | DNAJB1   | 150 | 2475   | mechanistic target of rapamycin (serine/threonine kinase)            | MTOR     | 230 | 55062  | WD repeat domain, phosphoinositide interacting 1    | WIPI1    |
| 71 | 4189   | DnaJ (Hsp40) homolog, subfamily B, member 9                                                        | DNAJB9   | 151 | 4609   | v-myc myelocytomatosis viral oncogene homolog (avian)                | MYC      | 231 | 26100  | WD repeat domain, phosphoinositide interacting 2    | WIPI2    |
| 72 | 55332  | DNA-damage regulated autophagy modulator 1                                                         | DRAM1    | 152 | 92345  | nuclear assembly factor 1 homolog (S. cerevisiae)                    | NAF1     | 232 | 53349  | zinc finger, FYVE domain containing 1               | ZFYVE1   |
| 73 | 9695   | ER degradation enhancer, mannosidase alpha-like 1                                                  | EDEM1    | 153 | 10135  | nicotinamide phosphoribosyltransferase                               | NAMPT    |     |        |                                                     |          |
| 74 | 1938   | eukaryotic translation elongation factor 2                                                         | EEF2     | 154 | 4077   | neighbor of BRCA1 gene 1                                             | NBR1     |     |        |                                                     |          |
| 75 | 29904  | eukaryotic elongation factor-2 kinase                                                              | EEF2K    | 155 | 10787  | NCK-associated protein 1                                             | NCKAP1   |     |        |                                                     |          |
| 76 | 1956   | epidermal growth factor receptor (erythroblastic leukemia viral (v-erb-b) oncogene homolog, avian) | EGFR     | 156 | 4780   | nuclear factor (erythroid-derived 2)-like 2                          | NFE2L2   |     |        |                                                     |          |
| 77 | 5610   | eukaryotic translation initiation factor 2-alpha kinase 2                                          | EIF2AK2  | 157 | 4790   | nuclear factor of kappa light polypeptide gene enhancer in B-cells 1 | NFKB1    |     |        |                                                     |          |
| 78 | 9451   | eukaryotic translation initiation factor 2-alpha kinase 3                                          | EIF2AK3  | 158 | 159296 | NK2 transcription factor related, locus 3 (Drosophila)               | NKX2-3   |     |        |                                                     |          |
| 79 | 1965   | eukaryotic translation initiation factor 2, subunit 1 alpha, 35kDa                                 | EIF2S1   | 159 | 58484  | NLR family, CARD domain containing 4                                 | NLRC4    |     |        |                                                     |          |
| 80 | 1978   | eukaryotic translation initiation factor 4E binding protein 1                                      | EIF4EBP1 | 160 | 4864   | Niemann-Pick disease, type C1                                        | NPC1     |     |        |                                                     |          |
